# 1 Heritable maize microbiomes contribute to local adaptation and 2 host stress resilience

3  
4 Xiaoming He<sup>1,2,3,#</sup>, Danning Wang<sup>2,3,#</sup>, Yong Jiang<sup>4,#</sup>, Meng Li<sup>5,#</sup>, Manuel Delgado-  
5 Baquerizo<sup>6,7,#</sup>, Chloe McLaughlin<sup>5</sup>, Caroline Marcon<sup>3</sup>, Li Guo<sup>3</sup>, Marcel Baer<sup>3</sup>, Yudelsy A.T. Moya<sup>8</sup>,  
6 Nicolaus von Wirén<sup>8</sup>, Marion Deichmann<sup>9</sup>, Gabriel Schaaf<sup>9</sup>, Hans-Peter Piepho<sup>10</sup>, Zhikai Yang<sup>11</sup>,  
7 Jinliang Yang<sup>11</sup>, Bunlong Yim<sup>12</sup>, Kornelia Smalla<sup>12</sup>, Sofie Goormachtig<sup>13,14</sup>, Franciska T. de Vries<sup>15</sup>,  
8 Hubert Hüging<sup>16</sup>, Ruairidh J. H. Sawers<sup>5,\*</sup>, Jochen C. Reif<sup>4,\*</sup>, Frank Hochholdinger<sup>3,\*</sup>, Xinpeng Chen<sup>1,\*</sup>,  
9 Peng Yu<sup>2,3,\*</sup>

10

11 <sup>1</sup> College of Resources and Environment, and Academy of Agricultural Sciences, Southwest University  
12 (SWU), 400715 Chongqing, P. R. China

13 <sup>2</sup> Emmy Noether Group Root Functional Biology, Institute of Crop Science and Resource Conservation  
14 (INRES), University of Bonn, 53113 Bonn, Germany

15 <sup>3</sup> Crop Functional Genomics, Institute of Crop Science and Resource Conservation (INRES), University  
16 of Bonn, 53113 Bonn, Germany

17 <sup>4</sup> Department of Breeding Research, Leibniz Institute of Plant Genetics and Crop Plant Research (IPK),  
18 06466 Gatersleben, Germany

19 <sup>5</sup> Department of Plant Science, Pennsylvania State University, State College, PA 16802, USA

20 <sup>6</sup> Laboratorio de Biodiversidad y Funcionamiento Ecosistémico. Instituto de Recursos Naturales y  
21 Agrobiología de Sevilla (IRNAS), CSIC, Av. Reina Mercedes 10, E-41012, Sevilla, Spain.

22 <sup>7</sup> Unidad Asociada CSIC-UPO (BioFun). Universidad Pablo de Olavide, 41013 Sevilla, Spain.

23 <sup>8</sup> Department of Physiology and Cell Biology, Leibniz Institute of Plant Genetics and Crop Plant  
24 Research (IPK), 06466 Gatersleben, Germany

25 <sup>9</sup> Plant Nutrition, Institute of Crop Science and Resource Conservation (INRES), University of Bonn,  
26 53115 Bonn, Germany

27 <sup>10</sup> Biostatistics Unit, University of Hohenheim, 70599 Stuttgart, Germany

28 <sup>11</sup> Department of Agronomy and Horticulture, University of Nebraska-Lincoln, NE 68583 Lincoln, United  
29 States

30 <sup>12</sup> Institute for Epidemiology and Pathogen Diagnostics, Julius Kühn-Institut – Federal Research Centre  
31 for Cultivated Plants (JKI), Messeweg 11–12, D-38104 Braunschweig, Germany

32 <sup>13</sup> Department of Plant Biotechnology and Bioinformatics, Ghent University, Ghent,  
33 Belgium.

34 <sup>14</sup> Center for Plant Systems Biology, VIB, Ghent, Belgium.

35 <sup>15</sup> Institute for Biodiversity and Ecosystem Dynamics, University of Amsterdam, Amsterdam,  
36 Netherlands.

37 <sup>16</sup> Crop Science Group, Institute of Crop Science and Resource Conservation (INRES), University of  
38 Bonn, 53115 Bonn, Germany

39

40 # These authors equally contributed to this work.

41 \* To whom correspondence should be addressed:

42 [rjs6686@psu.edu](mailto:rjs6686@psu.edu)

43 [reif@ipk-gatersleben.de](mailto:reif@ipk-gatersleben.de)

44 [hochholdinger@uni-bonn.de](mailto:hochholdinger@uni-bonn.de)

45 [chenxp2017@swu.edu.cn](mailto:chenxp2017@swu.edu.cn)

46 [yupeng@uni-bonn.de](mailto:yupeng@uni-bonn.de)

47

48 **Running title:** Adaptive advantage of maize against soil microbes

49 **Key words:** Adaptation, maize, microbiome, root, rhizosphere

50

51 **Author contributions**

52 P.Y., X.C. and F.H. designed the study; P.Y. coordinated and managed the whole project; X.H.  
53 performed the culture and harvest of the phytochamber experiments. D.W. analysed the microbiome  
54 data and performed all statistical analysis; Y.J. and J.C.R., performed the genetic analysis; C.Mc. and  
55 R.J.H.S. performed machine learning and environmental genome-wide association analysis; M.D.B.  
56 performed ecological analysis; B.Y. and K.S. contributed bacterial strains from maize; X.H. and M.B.  
57 performed bacterial inoculation experiments; X.H. and L.G. extracted all the DNA samples; M.L., Z. Y.  
58 and J. Y performed the genomic prediction analysis; P.Y. and H-P P. discussed and designed the large  
59 pot experiment; C.Ma. and F.H. contributed the Mu-transposon induced lines; M.D., G.S., Y.A.T.M. and  
60 N.v.W. conducted the soil and plant nutrient analyses. S.J.S. and H.H. performed the preparation of soil  
61 from Dikopshof long-term experimental station; X.H., D.W., Y.J., M.L., M.D.B., R.J.H.S., J.C.R., X.C.,  
62 F.H. and P.Y. wrote the paper. All authors read and approved the final version of the manuscript.

63

64

65 **Abstract**

66 Beneficial interactions with microorganisms are pivotal for plant adaptation and fitness. Yet, the adaptive  
67 trajectories and genetic mechanisms underlying plant-microbiome interactions remain elusive. Here,  
68 we surveyed the root and rhizosphere microbiome of 129 accessions of *Zea mays*, sourced from diverse  
69 habitats and grown under control and different stress conditions. We demonstrate the impact of  
70 domestication and local adaptation on heritable variation in microbiome assembly. Plant genotype and  
71 native environment were predictive of the microbiome composition, and the microbiome itself was  
72 correlated with plant fitness. Combining microbiome and environmental properties identified host  
73 genetic variants linked to rhizosphere microbiome variation with respect to their native habitats. We  
74 functionally characterized a gene that controls lateral root formation and mediates association with a  
75 keystone microbe, linked to growth promotion and biomass heterosis. We conclude that genetic  
76 variation in traditional crop varieties contributes to optimizing the adaptation of the microbiome to local  
77 constraints, which bears implications for breeding resilient cultivars.

## 78 Main

79 Microorganisms that colonize the rhizosphere surrounding plant roots, root surfaces and internal tissues  
80 play a pivotal role in regulating plant health and fitness under biotic and abiotic stresses<sup>1,2</sup>. Nevertheless,  
81 the genetic basis of how host plants control the composition of their root microbiome under optimal or  
82 stress conditions remains poorly understood. This critical gap of knowledge remains for two reasons.  
83 First, we do not understand the degree to which plants can establish and maintain key microbiomes to  
84 ensure plant fitness under particular stress conditions. For example, legumes can develop specified  
85 root structures in association with rhizobia to support keystone microbiomes. Yet, whether cereal crops  
86 developed strategies to accommodate less well-known microbes with a similar impact on plant  
87 performance and resilience remains virtually unknown. Second, we lack comprehensive studies  
88 investigating the influence of heritable root traits in driving crop microbiomes. The reason is that the  
89 influence of crop species on microbiomes is often exclusively investigated in isolation for a particular  
90 crop variety without considering the vast immensity of trait variation across crop varieties and  
91 domestication status. Optimization of the crop microbiome has been proposed as a long-term route to  
92 promoting food security, while supporting a healthy environment<sup>3,4</sup>. Domesticated plants, in particular  
93 locally adapted traditional varieties (“landraces”), provide a powerful resource to investigate the  
94 contribution of crop microbiomes to local adaptation across diverse, and often challenging  
95 environments<sup>5-8</sup>. During domestication plants have developed resilience to environmental constraints,  
96 but may have also lost beneficial microbiome-associated traits compared with their wild relatives<sup>9,10</sup>.  
97 Maize (*Zea mays*. L) is an excellent model for investigating the genetic basis of environmental  
98 adaptation due to the extensive climatic variation across its original habitats<sup>11,12</sup>. Understanding the  
99 genetic basis of how host plants control the composition of their microbiome is critical to reduce the  
100 chemical footprint of agriculture and to promote crop resilience to various abiotic stresses that are likely  
101 to increase in future climate scenarios.

## 102 Heritable variation is detected in the maize microbiome under abiotic stresses

103 We used 16S rRNA gene and ITS gene sequencing to characterize the root and rhizosphere  
104 microbiome of 129 *Zea* accessions, across a wide range of maize and teosinte varieties of distinct  
105 domestication status, aiming at investigating the impact of plant genotype and local adaptation on crop-  
106 microbiome associations and their capacity to influence plant fitness under common stress conditions.  
107 These analyses included 11 teosinte, 97 landrace, 11 maize inbred line and 10 maize hybrid accessions  
108 (Supplementary Fig. 1) grown in control-, low phosphorous-, low nitrogen-, and drought-exposed soils  
109 to simulate different levels of nutrient and water stress (Supplementary Fig. 2). We sampled root and  
110 rhizosphere compartments from 1<sup>st</sup> shoot-borne crown roots (Supplementary Fig. 3), in addition to  
111 collecting bulk soil. Microbial community composition differed across samples for both bacteria and  
112 fungi, with compartment explaining the largest proportion of the variation followed by stress treatment  
113 (Fig. 1a). Although plant genotype was less important than either compartment or treatment, there was  
114 still significant heritable variation associated with both bacterial and fungal microbiomes (Fig. 1b). In the  
115 rhizosphere and roots, we observed significantly lower bacterial diversity under drought stress and  
116 nitrogen deficiency compared to control conditions (Supplementary Fig. 4a). In contrast, no significant  
117 differences in bacterial community diversity were observed between phosphorus deficient and control  
118 conditions (Supplementary Fig. 4a). For fungal diversity, the only significant treatment difference was  
119 observed between nitrogen deficiency and control conditions in both the rhizosphere and the root  
120 (Supplementary Fig. 4b). These results illustrate greater sensitivity under abiotic stresses of maize-  
121 associated bacterial than of fungal communities, while the variation of plant genotype has a small but  
122 significant heritable impact on microbiome assemblage<sup>13-15</sup>, more so under abiotic stresses.

## 123 Keystone genera define the major differences in the microbiome

124 Keystone microbial taxa are defined as the drivers of microbiome structure and function<sup>16</sup>. We identified  
125 putative keystone microbes among the highly abundant amplicon sequence variants (ASVs) using co-  
126 occurrence network analysis (Supplementary Datasets 1-4). Overall, the number of associations and  
127 accumulative weights of ASVs were largely positive within the bacterial or fungal networks, but negative  
128 in the inter-kingdom network (Supplementary Fig. 5; Supplementary Dataset 5). This is consistent with  
129 previous reports that inter-kingdom interactions determine the overall assembly, stability, and fitness of  
130 the root microbiome in *Arabidopsis*<sup>17</sup>. We also observed that a high proportion of the negative inter-  
131 kingdom associations were conserved across the stress treatments (Supplementary Fig. 5c;  
132 Supplementary Dataset 6). For example, keystone taxa in the bacterial genera *Massilia*, *Sphingobium*  
133 and *Streptomyces* were conserved across the stress treatments (Supplementary Fig. 6). Functional  
134 prediction indicates that these bacterial genera are involved in ureolysis (*Massilia*) and aerobic  
135 chemoheterotrophy (*Sphingobium* and *Streptomyces*) (Supplementary Dataset 7). Keystone fungal

136 taxa were mainly decomposers and pathogens (Supplementary Dataset 8). Overall, our co-occurrence  
137 network analyses revealed strong negative correlations between bacterial and fungal ASVs in roots,  
138 while keystone bacterial members are important in microbiome assemblage and stability regardless of  
139 abiotic stress treatment. Thus, bringing back keystone and microbiome related traits from wild relatives  
140 as well as broader crop diversity may contribute to adaptation of crops to future challenges of climate  
141 change.

## 142 **The impact of plant genotype on the rhizosphere bacterial community increases under stress**

143 To estimate the influence of the plant genotype on microbiome composition, we estimated the  
144 correlation between the plant genetic distance matrix and the microbiome distance matrix, for both root  
145 and rhizosphere. There was a significant correlation between the bacterial communities and plant  
146 genotypes in both compartments. In contrast, fungi displayed a significant correlation with the plant  
147 genotype only in the rhizosphere (Supplementary Fig. 7). We estimated the broad-sense heritability ( $H^2$ )  
148 for the microbiome at different taxonomic levels and for individual ASVs across the experiment and then  
149 separately for each compartment and treatment combination (Supplementary Dataset 9; see methods).  
150 Plant genotype explained a small but significant proportion of variation in the microbiome compared  
151 with compartment or treatment (Supplementary Fig. 8). Across treatments,  $H^2$  was higher for the  
152 rhizosphere than the root at the level of families (Fig. 1b), genera (Supplementary Fig. 9a) or ASVs  
153 (Supplementary Fig. 9b). Nutrient stress increased  $H^2$  for the bacterial microbiome, but not of the fungal  
154 microbiome. In particular, the bacterial taxon *Oxalobacteraceae* under nitrogen limitation showed the  
155 highest  $H^2$  among all families in our experiment (Supplementary Fig. 10). *Oxalobacteraceae* have been  
156 previously proposed to play an important role in maize resilience when grown in nitrogen-deficient  
157 soils<sup>18</sup>. To identify plant genetic loci affecting microbiome composition, we performed genome-wide  
158 association (GWA) analysis for all heritable ( $H^2 > 0.1$ ) microbial traits (Supplementary Dataset 10). We  
159 did not recover significant markers in association with overall measures of microbial alpha-diversity  
160 (Shannon index). We did, however, identify significant associations with individual ASVs  
161 (Supplementary Dataset 11). The number of significant associations increased 1.5-3 times from the  
162 rhizosphere to the root microbiome (Supplementary Fig. 11), consistent with overall estimates of  $H^2$ .  
163 Our genetic and environmental analyses support the hypothesis that the genetic constitution of the host  
164 shapes microbiome assembly in crops<sup>19-23</sup>. Furthermore, our work highlights the importance of  
165 ecological and genetic factors driving plant-microbe interactions in favour of local adaptation.  
166 Collectively, these data indicate an increasing impact of the plant genotype on microbiome composition,  
167 especially the composition of the rhizosphere bacterial community under stress, consistent with a role  
168 of the microbiome in plant adaptation to local environmental constraints.

## 169 **Plant source habitats predict the root and rhizosphere microbiome**

170 To further address the hypothesis that plant control of soil microbes plays a role in local adaptation, we  
171 assessed the potential of the environment at the point of collection of local varieties to predict the  
172 microbiome in our standardized growth chamber experiments. For each plant accession, we compiled  
173 soil and climatic descriptors from public databases (see methods) corresponding to the point of  
174 collection (Supplementary Fig. 1; Supplementary Dataset 12). To reduce the complexity of the  
175 microbiome data, we applied Spearman correlation analysis and defined four microbial assemblies  
176 corresponding to the respective dominant ASVs (Supplementary Figure 12). We then sought evidence  
177 of covariation among microbial assemblies and environmental descriptors (Supplementary Figure 13).  
178 We used structural equation modeling to quantify the cumulative effects of source environment, plant  
179 genetic diversity, stress treatment, domestication status and biomass on the four microbial assemblies.  
180 These analyses demonstrated the impact of plant genotype and source environment on specific  
181 assemblies of microbial communities. Low nitrogen treatment, source mean annual temperature,  
182 source precipitation and plant genotype strongly impacted the microbiome assemblage (Supplementary  
183 Figure 14), one notable example being the abundance of the genus *Massilia*, which belongs to the  
184 previously mentioned *Oxalobacteraceae* (Supplementary Figure 15). We then investigated the potential  
185 of plant genotype and environmental descriptors to predict microbiome composition. Overall, prediction  
186 was better for bacterial data than for fungal data, and better for rhizosphere than root (Fig. 2a;  
187 Supplementary Fig. 16). Interestingly, microbiome composition could be predicted more accurately with  
188 environmental descriptors or a combination of these with plant genetic markers than with genetic  
189 markers alone (Fig. 2a; Supplementary Fig. 17-19). Our combined ecological modelling and prediction  
190 analyses indicate that genetic differentiation across plant source environments impacts the microbiome,  
191 notably the composition of rhizosphere bacterial communities, consistent with local adaptation of maize  
192 to key climate and soil properties. Therefore, plant-microbe associations depend on the match between  
193 partner genotypes and bacterial adaptation to their local host<sup>24,25</sup>, thus supporting the notion that the  
194 impact of the genotype on microbial hubs contributes to host fitness across environments<sup>26</sup>.

## 195 **Consideration of the rhizosphere bacterial community improves prediction of plant fitness traits**

196 Although environmental conditions were dominant drivers of the crop microbiome, we also found certain  
197 microbial taxa that were consistently influenced by genetic variability in maize, and whose abundance  
198 correlated with plant fitness. To assess the importance of the microbiome for plant performance, we  
199 used a two-step strategy combining genomic prediction and Random Forest models based on  
200 environmental descriptors. First, we evaluated the  $H^2$  of fitness-related phenotypes including biomass,  
201 leaf area, leaf chlorophyll content (measured by SPAD) and nitrogen and phosphorus concentration  
202 (Supplementary Figure 20). The average  $H^2$  of all nutrient traits was 0.45 under control conditions rising  
203 to a maximum of 0.53 for the low nitrogen treatment (Supplementary Dataset 13). Despite moderately  
204 high  $H^2$  values, the only associations we obtained in GWA analysis for our fitness traits were for  
205 biomass (Supplementary Datasets 14 and 15). Next, we explored the ability to predict fitness-related  
206 phenotypes using microbiome ASVs abundance data alone or in combination with plant genotype. The  
207 combination of plant genotype and rhizosphere bacterial community composition provided the highest  
208 average prediction ability and the largest prediction coverage across all fitness traits (Fig. 2b;  
209 Supplementary Datasets 16 and 17). We confirmed this result employing an alternative approach to fit  
210 a ridge regression mixed model, observing greater prediction accuracy when using both genetic and  
211 microbiome data (Supplementary Figure 21). As has been previously seen in foxtail millet<sup>23</sup>, we showed  
212 a conserved pattern that the rhizosphere microbiome combined with genotype data increased the  
213 prediction accuracy of agronomic traits compared to genetic markers alone (Supplementary Figure 22).  
214 We then explored relationships among source environments, genetic differentiation and specific  
215 microbial taxa. As a measure for the pattern of similarity among samples, we calculated matrices of  
216 pairwise distance using the observed microbiome ASVs in different treatments, and two source  
217 environmental descriptors (*elevation* and *geographical distance*). Mantel tests were used to study the  
218 correlations between different distance matrices. We observed that the correlation between the  
219 rhizosphere microbiome and source environment was higher than that between the root microbiome  
220 and environment. On average, the correlations of inter-treatment and treatment-environment similarity  
221 patterns as characterized by bacterial communities were higher than by fungal communities  
222 (Supplementary Fig. 23). To reduce dimensionality, we extracted the first five principal components  
223 (PCs) from the microbiome ASV data. We then used a Random Forest (RF) approach to predict these  
224 PCs using different environmental descriptors as explanatory variables (Supplementary Dataset 12).  
225 We observed the highest accuracy for the rhizosphere bacteria PC2 (Supplementary Fig. 24a) using  
226 environmental predictors including *photosynthetically active radiation* and *potential evapotranspiration*  
227 (Supplementary Fig. 24b). Prediction of individual ASVs was less successful (Supplementary Fig. 25),  
228 although significant predictors were identified for specific examples belonging to the *Oxalobacteraceae*,  
229 including *Massilia* (Supplementary Fig. 26). These results suggest that plant genetic variation linked to  
230 source environment drives variation in the microbiome composition with an impact of plant fitness.  
231 Rhizosphere microbiome variation explains microbial diversity along a broad range of temperatures and  
232 water availabilities, supporting the increasing functional importance of the rhizosphere under harsh  
233 environments<sup>27</sup> and as a heritable trait across environments<sup>28</sup>. We report here a significant advantage  
234 for plant trait prediction when combining rhizosphere microbiome with plant genetic data, which  
235 highlights the potential utility of the rhizosphere microbiome in breeding stress-resilient crops.

## 236 **A candidate gene linked to the source environment associates with *Oxalobacteraceae* and root** 237 **branching**

238 To identify loci associated with variation in the microbiome and differences in source environment, we  
239 used our RF models to predict microbiome ASVs for 1781 genotyped traditional varieties on the basis  
240 of associated source environmental descriptors and subsequently implemented GWA analyses (Fig.  
241 3a). One of the best predictions (RF model  $R^2 = 0.28$ ) was for root abundance of ASV37, belonging to  
242 the genus *Massilia*, in the low nitrogen treatment, consistent with our previous estimates of  $H^2$ .  
243 Collectively, GWA hits from environmental predictions of ASV37 abundance for the 1781 panel  
244 overlapped more than expected by chance with the hits from the observed ASV37 data in the smaller  
245 129 panel (Supplementary Fig. 27). The top GWA hit for predicted ASV37 root abundance under low  
246 nitrogen (SNP S4\_10445603) fell within the gene Zm00001d048945 on chromosome 4 (Fig. 3a and b;  
247 Supplementary Dataset 18). Across the 1781 panel, the minor allele at SNP S4\_10445603 was more  
248 abundant at higher predicted ASV37 abundance but lower source soil nitrogen content (Fig. 3c). These  
249 findings are consistent with a specific gene contributing to the geographical adaptation to nitrogen-poor  
250 soil by facilitating enhanced association with *Massilia*<sup>18</sup> (Supplementary Fig. 28). The gene  
251 Zm00001d048945 is most strongly expressed in the root cortex (Fig. 3d;  
252 [https://www.maizegdb.org/gene\\_center/gene/Zm00001d048945](https://www.maizegdb.org/gene_center/gene/Zm00001d048945)) and is predicted to encode a TPX2  
253 domain containing protein related to the WAVE-DAMPENED2 microtubule binding protein that functions

254 in *Arabidopsis* root development<sup>29</sup> and lateral root initiation<sup>30</sup>. Using root architectural data available for  
255 the 126 panel, we found a positive correlation between lateral root density and ASV37 abundance ( $r =$   
256  $0.2$ ,  $P = 0.03$ ; Fig. 3e). To test the hypothesis that variation in Zm00001d048945 contributes to a root-  
257 architecture-related effect on ASV37, we identified transposon insertional mutants in two different  
258 genetic backgrounds (B73 and F7; Supplementary Fig. 29). Plants homozygous for transposon  
259 insertions in Zm00001d048945 showed a significant reduction in lateral root density (Fig. 3f and g).  
260 During maize domestication and improvement, the root system expanded its functionality and  
261 complexity<sup>31,32</sup>. We interpret these results as evidence that variation at Zm00001d048945 contributes  
262 to local adaptation by optimizing root traits and recruitment of specific microbes in low nitrogen soils.  
263 Notably, we found that potentially environment-adaptive alleles may explain microbiome-driven nitrogen  
264 deficiency tolerance and root trait differentiation. These results provide strong support for a genetic  
265 basis for variation in the abundance of the bacterial taxon *Massilia* (*Oxalobacteraceae*) under nitrogen  
266 deficiency, illustrating the importance of specific bacteria for root development<sup>33</sup>, nitrogen acquisition<sup>34</sup>  
267 and reciprocal interaction<sup>18</sup>. We conclude that plants have evolved to overcome abiotic stresses by  
268 interacting with specific microbial taxa and adjusting their rhizosphere microbiome to nitrogen  
269 availability.

### 270 **The bacterial keystone taxon *Oxalobacteraceae* contributes to maize biomass heterosis**

271 To explore further the effect of root-microbe interactions on maize tolerance to low nitrogen, we focused  
272 more broadly on the *Oxalobacteraceae*, which contains the genus *Massilia* and have previously been  
273 characterized to be important under nitrogen limitation<sup>18</sup> (Fig. 3). GWA analyses demonstrated that the  
274 abundance of *Massilia* ASVs ASV37 and ASV49 can be explained at high probability by marker-trait  
275 associations (Sum  $R^2 = 0.52$  and  $0.28$ , respectively), while significant associations were also identified  
276 in presence/absence GWA analysis for ASV49 (Fig. 4a; Supplementary Dataset 19). Recent studies  
277 highlighted that recruitment of the maize rhizosphere microbial community has been substantially  
278 impacted by both domestication<sup>35,36</sup> and modern hybrid breeding<sup>37,38</sup>. Modern breeding is accompanied  
279 by progressive habitat changes with the use of pesticides and fertilizers to promote high yields and to  
280 protect domesticated crops from biotic and abiotic stress factors despite the risk of adverse effects on  
281 the establishment of beneficial microbial associations<sup>39</sup>. To this end, we explored the genetic potential  
282 of microbiome optimization in crop breeding based on the heterosis for microbiome traits (Fig. 4b),  
283 finding that soil microbes differentially impact the early growth of inbred and hybrid maize<sup>40</sup>. We tested  
284 mid-parent heterosis of individual ASVs using FDR-corrected  $t$ -tests of their variance-stabilized  
285 abundances. Here the heterosis of individual ASVs was defined with respect to mid-parent values. In  
286 most crossing triplets, the majority of the rhizosphere bacterial ASVs showed some evidence of mid-  
287 parent heterosis, however the prevalence of ASV heterosis varied among hybrids for different taxa (Fig.  
288 4b; Supplementary Dataset 20). Specifically, *Oxalobacteraceae* abundance showed heterosis in the  
289 rhizosphere of B73  $\times$  H99, B73  $\times$  H84, B73  $\times$  A554 and B73  $\times$  Mo17 (Fig. 4b). To characterize the  
290 relationship between growth heterosis and abundance of *Oxalobacteraceae* or the specific *Massilia*  
291 ASV37, we performed root inoculation experiments. We inoculated with ASV37 alone, with a 17-  
292 member synthetic bacterial community (SynCom) of *Oxalobacteraceae* that did not include ASV37  
293 (*Duganella*, *Pseudoduganella*, *Collimonas* and *Janthinobacterium*), or with an 18-member SynCom  
294 including the 17-members with the addition of ASV37. We quantified root and shoot growth in inbred  
295 lines and hybrids in both nitrogen-rich and nitrogen-poor soil. We found that *Oxalobacteraceae* were  
296 important to maintain the growth of hybrids irrespective of soil nitrogen levels, but only necessary for  
297 growth of inbred lines under nitrogen-poor soil (Supplementary Figure 30). Moreover, when we  
298 compared the degree of mid-parent heterosis for shoot dry biomass, absence of *Oxalobacteraceae*  
299 were important to promote heterosis in nitrogen-poor soil (Fig. 4c), thus suggesting that growth of inbred  
300 parents might depend more on *Oxalobacteraceae* than hybrids. Furthermore, we verified that different  
301 SynComs or single ASV inoculation of *Massilia* ASV37 can significantly induce lateral root formation in  
302 both inbred lines and hybrids under nitrogen-poor conditions (Supplementary Figure 31). In particular,  
303 we found that heterosis for lateral root density correlated tightly with that in shoot biomass under  
304 nitrogen-poor conditions (Fig. 4d). Significantly, the microbial hub taxon *Massilia* alone can contribute  
305 to heterosis for lateral roots and biomass of maize, indicating the potential value of root trait interactions  
306 with keystone microbial taxa when breeding for crop resilience.

### 307 **Conclusions**

308 Our study advances the current understanding of plant-microbiome-environment interactions by  
309 demonstrating that local adaptation and domestication can govern assembly, dynamics and stability of  
310 bacterial hub members and functional capabilities of the maize microbiome in diverse environmental  
311 habitats. Beneficial associations between maize and the local soil microbiome could have played a role  
312 in plant survival and reproduction during historical expansion to new environments. Understanding how

313 plants modulate the microbiome to help them to adapt to local environments and how this is encoded  
314 in the genetic program provides novel insights into establishment of beneficial host–microbiome  
315 associations. This knowledge is crucial to harnessing the crop microbiome to support food production  
316 and will facilitate the identification of environment-tailored cultivars recruiting favourable microbial  
317 consortia for increasing agricultural productivity, resilience to climate change and sustainability.

## 318 **Online Methods**

### 319 **Plant material, soil collection and growth conditions**

320 The germplasm used in this study was selected to represent a broad diversity ranging from the maize  
321 progenitor teosinte to local open pollinating landraces and modern inbred lines and hybrids  
322 (Supplementary Dataset 21; Supplementary Fig. 1). We obtained the 11 geographically diverse teosinte  
323 accessions from the North Central Regional Plant Introduction Station (NCRPIS) and the International  
324 Maize and Wheat Improvement Center (CIMMYT). Moreover, we received the 97 landrace accessions  
325 from NCRPIS and these accessions were derived from the ten American countries which cover the  
326 major domestication areas of maize (Supplementary Fig. 1a). The modern breeding germplasm  
327 includes seven genetically diverse inbred lines<sup>41</sup> covering the major heterotic groups stiff-stalk and non-  
328 stiff stalk and four additional tropical inbred lines (Supplementary Fig. 1b). We have produced the ten  
329 hybrids by crossing the ten inbred lines with the reference inbred line B73 as the common mother plant  
330 (Supplementary Fig. 1c). Soil used for phytochamber pot experiments was dug from the Dikopshof long-  
331 term fertilizer field experiment established in 1904 near Cologne, Germany (50°48'21"N, 6°59'9"E)  
332 (Supplementary Fig. 2a). In this study, we collected soil subjected to three different fertilization  
333 managements including control soil fertilized with all nutrients, low nitrogen soil fertilized without  
334 nitrogen and low phosphorus soil fertilized without phosphorus as defined accordingly<sup>42</sup>. The general  
335 soil type is classified as a Haplic Luvisol derived from loess above sand. Approximately the first 0-20  
336 cm of the soil were collected and placed in a clean plastic bag. Subsequently, collected soil was dried  
337 at room temperature in clean plastic trays for about one week and sieved with a 4 mm analytical sieve  
338 (Retsch, Haan, Germany) to remove stones and vegetative debris. The sieved soil for the whole  
339 experiment was then homogenized with a MIX125 concrete mixer (Scheppach, Ichenhausen, Germany)  
340 (Supplementary Fig. 2a). The air-dried soil was ground into powder for the analysis of carbon, nitrogen,  
341 phosphorus and five metal elements (K, Fe, Mn, Cu, Zn). Soil pH was measured in deionized water  
342 (soil: solution ratio, 1:2.5 w/v) using a pH-meter 766 (Knick, Berlin, Germany). The basic physical and  
343 chemical properties of these soils are provided in Supplementary Table 1.

344 Local landraces are open-pollinated varieties and can vary largely on seed traits. Therefore, we covered  
345 a broad geographic area but also confirmed the homogeneity of the 97 landraces concerning seed size,  
346 seed color, and seed quality prior our phytochamber experiments (Supplementary Fig. 2b). Seeds were  
347 surface-sterilized with 6% NaClO for 10 min, and rinsed 3 times with sterile deionized water to eliminate  
348 any seed-borne microbes on the seed surface. The sterilized seeds were pre-germinated for 3 days in  
349 a paper roll system using germination paper (Anchor Paper Co., St. Paul, MN, USA) with sterile  
350 deionized water. Then seedlings with primary roots of ca. 1–2 cm length were transferred to soil-filled  
351 pots (7 × 7 × 20 cm<sup>3</sup>) in a 16/8-h light/dark, 26/18 °C cycle and were grown for 4 weeks in a walk-in  
352 phytochamber. A detailed sowing and transfer plan is provided in Supplementary Fig. 2c. No additional  
353 fertilizer was added.

### 354 **Experimental design and treatments**

355 The experiment was performed in a split plot design with three replications comprising four stress  
356 treatments on the main plots (trays) (Supplementary Fig. 32), e.g. fully fertilized control (CK) soil, no  
357 nitrogen fertilized low nitrogen (LN) soil, no phosphorus fertilized low phosphate (LP) and CK soil with  
358 drought (D) treatment. As controls, we used six pots without plants as 'bulk soil' samples (B), which  
359 were distributed across the main plots. Each tray contained a similar number of pots (subplots) with the  
360 different genotypes and bulk soil. The three replicates were performed at three different periods in the  
361 same growth chamber (Supplementary Fig. 32). For each stress treatment, we generated an alpha  
362 design for the genotypes and controls with three replicates and four incomplete blocks per replicate.  
363 The incomplete blocks were assigned to trays and replicates corresponded to the three replications of  
364 the experiment in time. To facilitate watering, pots subjected to the same treatment were allocated on  
365 the same tray. These trays were further randomized in the chamber. Distribution of all pots in each tray  
366 were randomized using a true random generator (excel function "RAND"), and trays were reshuffled  
367 every week in the growth chamber without paying attention to the pot labels. Since soil water availability  
368 will significantly affect the harvest of the rhizosphere and initiation of crown roots, we have performed  
369 a preliminary experiment with different water regimes (i.e. 33%, 22%, 17% water holding capacity) to  
370 ensure the establishment of suitable drought conditions and to facilitate rhizosphere harvesting and the  
371 optimal formation of the different whorls of crown roots (Supplementary Fig. 2c and 33). In brief, different  
372 volumes of sterilized water e.g. 60 ml, 40 ml, 30 ml were mixed with 500 g dry soil by spraying water  
373 and were then homogenized with a 4 mm sieve (Retsch). Each water regime was maintained by  
374 spraying water to the soil surface according to the weight loss of water during the 4-week culture. Plant  
375 height, total leaf area, shoot and root fresh biomass from the representative genotypes B73 and Mo17



376 were recorded. Moreover, the multifunctional device COMBI 5000 (STEP Systems, Nuremberg,  
377 Germany) was used to measure soil variables e.g. soil moisture and electronic conductivity directly in  
378 each soil pot during each experimental run. The covariates including sample harvest time, ID of person  
379 performing DNA extraction together with the determined soil variables were collected and used for  
380 downstream data analysis (Supplementary Dataset 22).

### 381 **Characterization of native collection sites of maize landraces**

382 Geographical coordinates and elevation information of the collection sites for maize landraces were  
383 retrieved from the public database of the U.S. National Plant Germplasm System ([https://www.grin-](https://www.grin-global.org/)  
384 [global.org/](https://www.grin-global.org/)) and provided in Supplementary Dataset 21. Most of the landraces were received in the  
385 years 1980-1994 and were maintained by NCRPIS. To get the climate and soil variables based on the  
386 geographical coordinates for each site, we first compiled climatic and soil descriptors representative of  
387 the long-term averages of their point of origin, following methods accordingly<sup>43</sup>. All used databases are  
388 publicly available and have global coverage. Data was collected from WorldClim<sup>44</sup>, the NCEP/NCAR  
389 reanalysis project (<https://psl.noaa.gov/data/reanalysis/reanalysis.shtml>)<sup>45</sup>, NASA SRB  
390 (<https://asdc.larc.nasa.gov/project/SRB>), Climate Research Unit (CRU)<sup>46</sup>, SoilGrids<sup>47</sup> and the Global  
391 Soil Dataset (GSD)<sup>48</sup>. All 156 bioclimatic and soil variables were merged with the maize germplasm  
392 identity into the Supplementary Dataset 12. The related information of total soil nitrogen, available  
393 phosphorus, and annual precipitation are provided in the Supplementary Fig. 34.

### 394 **Determination of shoot phenotypic traits and ionome profile**

395 Aboveground phenotypic traits were determined for all 129 genotypes on the day of harvest in the  
396 phytochamber. The leaf area and chlorophyll index as measured by SPAD were determined as  
397 described accordingly<sup>18</sup> and are provided in Supplementary Dataset 23. The complete aboveground  
398 part of maize plants excluding the seed was harvested and heat treated at 105 °C for 30 min, dried at  
399 70 °C to constant weight, weighed as the shoot dry biomass and then ground into powder.  
400 Approximately 6 mg of ground material was used to determine total nitrogen concentration in an  
401 elemental analyzer (Euro-EA, HEKAtech). Data were then calculated into peak areas by the software  
402 Callidus, providing quantitative results using reference material as a calibration standard. The same  
403 plant material was used to determine the concentrations of 13 additional mineral nutrients. In brief,  
404 approximately 200 mg of same ground material was weighed into polytetrafluoroethylene digestion  
405 tubes, and concentrated nitric acid (5 ml, 67–69%; Bernd Kraft) was added to each tube. After 4 h of  
406 incubation, samples were digested under pressure using a high-performance microwave reactor  
407 (Ultraclave 4, MLS). Digested samples were transferred to Greiner centrifuge tubes and diluted with  
408 deionized (Milli-Q) water to a final volume of 8 ml. Element analysis was carried out by Inductively  
409 Coupled Plasma-Optical Emission Spectroscopy (iCAP 7400 duo; Thermo Fisher Scientific). For  
410 sample introduction a SC-4 DX autosampler with prepFAST Auto-Dilution System (ESI, Elemental  
411 Scientific) was used. A three-point external calibration curve was set from a certified multiple-standards  
412 solution (Custom Multi-Element Standard\_PlasmaCAL, S-prep GmbH). The element Yttrium (ICP  
413 Standard Certipur®, Merck) was infused online and used as internal standard for matrix correction. All  
414 ionome data including concentrations and contents of all mineral nutrients are provided in the  
415 Supplementary Dataset 24.

### 416 **Root and rhizosphere samples harvest for microbiome analysis**

417 The root and rhizosphere samples collection were performed from 4-week-old maize plants as  
418 previously described<sup>18</sup>. In brief, whole root systems were carefully taken out from each pot and  
419 vigorously shaken to remove all soil not firmly attached to the roots. During this stage, most genotypes  
420 have consistently started to form the 2<sup>nd</sup> whorl of shoot-borne crown roots with a length of 3-10 cm. To  
421 synchronize the harvest for precise comparisons among genotypes, we collected the fully developed  
422 1<sup>st</sup> whorl of shoot-borne crown roots initiated from the coleoptilar node for all maize genotypes  
423 (Supplementary Fig. 6a). Two dissected crown roots with tightly attached soil were placed into a 15 ml  
424 Falcon (Sarstedt) tube and immediately frozen in liquid nitrogen and stored at -80 °C before extraction  
425 of rhizosphere soil. The rhizosphere samples were defined and extracted into PowerBead tubes (Mo  
426 Bio Laboratories) as described previously<sup>18</sup>. The root samples were harvested from another crown root  
427 from the same plant that immediately washed by tap water and rinsed with three times of sterilized  
428 water followed by tissue drying and placed in PowerBead tubes (Supplementary Fig. 6b). Sample  
429 processing steps for root and rhizosphere have been performed by a designated person to avoid  
430 systematic errors. The bulk soil samples were also collected from the unplanted pots. DNA extractions  
431 were performed soon after root and rhizosphere samples were harvested, following the PowerSoil DNA  
432 isolation kit (Mo Bio Laboratories) protocol.

### 433 **Amplicon library preparation and sequencing**

434 Amplicon library construction was processed with a similar workflow as previously described<sup>18</sup>  
435 (Supplementary Fig. 6c). In brief, for bacterial 16S rRNA gene libraries, the V4 region was amplified  
436 using the universal primers F515 (5' GTGCCAGCMGCCGCGGTAA 3') and R806 (5'  
437 GGACTACHVGGGTWTCTAAT 3')<sup>49</sup>. For fungal amplicon sequencing, the *ITS1* gene was amplified by  
438 the primer pair F (5' CTTGGTCATTTAGAGGAAGTAA 3') and R (5' GCTGCGTTCTTCATCGATGC 3').  
439 PCR reactions were performed with Phusion High-Fidelity PCR Master Mix (New England Biolabs)  
440 according to the manufacturer's instructions. Subsequently, only PCR products with the brightest bands  
441 at 400-450 base pairs (bp) were chosen for library preparation. Equal density ratios of the PCR products  
442 were mixed and purified with the Qiagen Gel Extraction Kit. Sequencing libraries were generated using  
443 the NEBNext Ultra DNA Library Pre Kit for Illumina, following the manufacturer's recommendations and  
444 with the addition of sequence indices. The library quality was checked on a Qubit 2.0 Fluorometer  
445 (Thermo Scientific) and Agilent Bioanalyzer 2100 system. Finally, the qualified libraries were sequenced  
446 by 250-bp paired-end reads on a MiSeq platform (Illumina).

### 447 **16S rRNA gene and ITS gene sequence processing**

448 Raw sequencing reads were processed following a similar workflow as previously described<sup>18</sup>. Briefly,  
449 paired-end 16S rRNA amplicon sequencing reads were assigned to samples based on their unique  
450 barcode and truncated by cutting off the barcode and primer sequence. Paired-end reads were merged  
451 using FLASH (v1.2.7)<sup>50</sup> and the splicing sequences were called raw tags. Sequence analyses were  
452 performed by QIIME 2 software (v2020.6)<sup>51</sup>. Raw sequence data were demultiplexed and quality filtered  
453 using the q2-demux plugin followed by denoising with DADA2<sup>52</sup> (via q2-dada2). Sequences were  
454 truncated at position 250 and each unique sequence was assigned to a different ASV. Taxonomy was  
455 assigned to ASVs using the q2-feature-classifier<sup>53</sup> and the classify-sklearn naïve Bayes taxonomy  
456 classifier against the SSUrRNA SILVA 99% OTUs reference sequences (v138)<sup>54</sup> at each taxonomic  
457 rank (kingdom, phylum, class, order, family, genus, species). Mitochondria- and chloroplast-assigned  
458 ASVs were eliminated. Out of the remaining sequences (only features with >10 reads in ≥2 samples)  
459 were kept to build an ASV table. In order to study phylogenetic relationships of different ASVs, multiple  
460 sequence alignments were conducted using mafft (via q2-alignment)<sup>55</sup> and the phylogenetic tree was  
461 built using fasttree2 (via q2-phylogeny)<sup>56</sup> in QIIME 2. Those sequences that did not align were removed.  
462 ITS amplicon data were processed the same as 16S amplicon data except that used the UNITE 99%  
463 ASVs reference sequences (v10.05.2021)<sup>57</sup> to annotate the taxonomy.

### 464 **Statistical analyses for microbial community assembly**

465 In consideration of experimental design, here we treated the trays as the main plots for different  
466 treatments as a random effect. There were four trays per period/replicate, and a replicate effect was  
467 considered to account for differences between the three replicates. All downstream analyses were  
468 performed in R (v4.1.0)<sup>58</sup>. Briefly, ASV tables were filtered with ≥10 reads in ≥2 samples. For α-diversity  
469 indices, Shannon index was calculated using ASV tables rarefied to 1,000 reads. For all the following  
470 analyses ASVs which express ≤0.05% relative abundance within ≤5% samples were filtered. After  
471 filtering taxa, the samples with ≤1000 reads were also removed. Bray–Curtis distances between  
472 samples were calculated using ASV tables that were normalized using  
473 'varianceStabilizingTransformation' function from DESeq2 (v1.34.0) package<sup>59</sup> in R. Constrained  
474 ordination analyses were performed using the 'capscale' function in R package vegan (v2.5-7)<sup>60</sup>. To  
475 test the effects of compartment, treatment and genotype on the microbial composition community,  
476 variance partitioning was performed using Bray–Curtis distance matrix between pairs of samples with  
477 a permutation-based PERMANOVA test using 'adonis' function in R package vegan<sup>60</sup>.

### 478 **Inter-kingdom associations by network analysis**

479 The method SPIEC-EASI (SParse Inverse Covariance Estimation for Ecological Association Inference)  
480 implemented in SpiecEasi (v1.1.2) R package was used to construct the inter-kingdom microbial  
481 associations<sup>61</sup> and network was visualized by Cytoscape (v3.9.1). For this network inference, only ASVs  
482 with relative abundance >0.05% in ≥10% samples were used. The filtered bacterial and fungal ASV  
483 table were combined as the input followed by the default centered log-ratio (CLR) transformation. The  
484 neighborhood selection measured by the Meinshausen and Bühlmann (MB) method<sup>62</sup> was selected as  
485 the inference approach. The number of subsamples for the Stability Approach to Regularization  
486 Selection (StARS) was set to 99.

### 487 **Genotyping of 129 maize genotypes**

488 Genomic DNA was extracted from leaves of bulked maize seedlings subjected to different treatments  
489 for each genotype (Supplementary Fig. 6). The genetic variation across the maize genotypes was  
490 characterized using a GenoBaits Maize40K chip containing 40 K SNP markers, which was developed  
491 using a genotyping by target sequencing (GBTS) platform in maize<sup>63</sup>. In brief, DNA fragmentation, end-  
492 repair and adding A-tail, adapter ligation and probe hybridization were performed. After ligation of the  
493 adapters and clean up, fragment size selection was done with Beckman AMPureBeads and a PCR step  
494 to enrich the library. Quantity and quality of the libraries were determined via Qubit™ 4 Fluorometer  
495 (Invitrogen) and Agilent 2100 Bioanalyzer, respectively. In total, 129 qualified and enriched libraries  
496 were sequenced as 250-400 bp on an MGISEQ-2000 (MGI, Shenzhen, China). The quality of raw  
497 sequencing reads was assessed and filtered by fastp (version0.20.0,  
498 [www.bioinformatics.babraham.ac.uk/projects/fastqc/](http://www.bioinformatics.babraham.ac.uk/projects/fastqc/)) with the parameters (-n 10 -q 20 -u 40). The clean  
499 reads were then aligned to the maize B73 reference genome v4 using the Burrows-Wheeler Aligner  
500 (BWA) (v0.7.13, [bio-bwa.sourceforge.net](http://bio-bwa.sourceforge.net)) with the MEM alignment algorithm. The SNPs were then  
501 called using the UnifiedGenotyper tool from Genome Analysis Toolkit (GATK, v3.5-0-g36282e4,  
502 [software.broadinstitute.org/gatk](http://software.broadinstitute.org/gatk)) SNP caller. The genetic distance matrix was calculated based on  
503 pairwise Rogers' distance<sup>64</sup>. A principal component analysis (PCA) was performed based on the filtered  
504 SNPs by GCTA software<sup>65</sup>. A phylogenetic tree (Supplementary Fig. 35) was generated using the  
505 neighbour-joining method as implemented in Mega 10.0.4 with 1,000 bootstraps using MEGA-X<sup>66</sup>.

### 506 **Analyses of phenotypic data**

507 For the three fitness phenotypes (SPAD, leaf area and biomass), we first performed the outlier test  
508 using the following model for a given stress treatment:

$$509 \quad y_{ijk} = \mu + \beta_{t(i)} + g_i + r_j + b_{jk} + e_{ijk}, \quad (1)$$

510 where  $y_{ijk}$  is the observation of the  $i$ -th genotype in the  $k$ -th block of the  $j$ -th complete replicate.  $\mu$  is the  
511 general mean,  $\beta_{t(i)}$  is the effect of the  $t(i)$ -th subpopulation ( $t(i)$  indicates the subpopulation that the  $i$ -th  
512 genotype belongs to. There are four subpopulations: teosinte, landraces, inbred lines and hybrids.),  $g_i$   
513 is the effect of the  $i$ -th genotype,  $r_j$  is the effect of the  $j$ -th replicate,  $b_{jk}$  is the effect of the  $k$ -th block  
514 nested within the  $j$ -th replicate and  $e_{ijk}$  is the residual term. All effects except the general mean were  
515 assumed to be random and follow an independent normal distribution.

516 After fitting the model, the residuals were standardized by the rescaled median of absolute deviation  
517 from the median (MAD) and then a Bonferroni-Holm test was applied to flag the outliers<sup>67</sup>.

518 For all traits including fitness phenotypes and microbial traits, we estimated the broad-sense heritability  
519 (also referred as repeatability in this case) in each treatment. The following model was used to estimate  
520 the heritability:

$$521 \quad y_{ijk} = \mu + g_i + r_j + b_{jk} + e_{ijk}, \quad (2)$$

522 where all notations were the same as in (1).

523 The heritability was calculated using the following formula:

$$524 \quad H^2 = \frac{\sigma_g^2}{\sigma_g^2 + \sigma_e^2/R}, \quad (3)$$

525 where  $\sigma_g^2$  and  $\sigma_e^2$  are the estimated genotypic and residual variance,  $R$  is the number of replications.

526 The best linear unbiased estimations (BLUEs) of all genotypes for each trait in each treatment were  
527 obtained by fitting Model (2) once more, assuming the general mean and genotypic effects are fixed  
528 and all other effects are random. All linear mixed models were fitted using the software ASReml-R 4.0<sup>68</sup>.

### 529 **Statistical framework for GWAS**

530 Prior to GWAS, we first performed quality control for the genotypic data. In brief, the missing genotypic  
531 values were imputed using the software Beagle 5.2<sup>69</sup>. After imputation, we removed the markers with  
532 minor allele frequency (MAF) <0.05. As heterozygous loci were very common in our data set, we also  
533 removed markers whose maximum genotype frequency is >0.95. In total, 157,785 SNP markers were  
534 used for GWAS. For all traits, GWAS was performed separately for each treatment (i.e., using the  
535 BLUEs within the treatment as the response variable). For microbiome ASVs and alpha-diversity traits,  
536 only those with a heritability >0.1 were used for GWAS.

537 A standard "Q+K" linear mixed model<sup>70</sup> was used in GWAS. More precisely, the model is of the following  
538 form:

539 
$$\mathbf{y} = \mathbf{X}\boldsymbol{\beta} + \mathbf{m}a + \mathbf{g} + \mathbf{e}, \quad (4)$$

540 where  $\mathbf{y}$  is the  $n$ -dimensional vector of phenotypic records (i.e. BLUEs within a certain treatment,  $n$  is  
541 the number of genotypes),  $\boldsymbol{\beta}$  is the  $k$ -dimensional vector of fixed covariates including the common  
542 intercept and the subpopulation effects.  $\mathbf{X}$  is the corresponding  $n \times k$  design matrix allocating each  
543 genotype to the subpopulation it belongs to.  $a$  is the additive effect of the marker being tested,  $\mathbf{m}$  is the  
544  $n$ -dimensional vector of marker profiles for all individuals. The elements in  $\mathbf{m}$  are coded as 0, 1 or 2,  
545 which is the number of minor alleles at the SNP.  $\mathbf{g}$  is an  $n$ -dimensional random vector representing the  
546 genetic background effects. We assume that  $\mathbf{g} \sim N(0, \mathbf{G}\sigma_g^2)$ , where  $\sigma_g^2$  is the genetic variance component,  
547  $\mathbf{G}$  is the VanRaden genomic relationship matrix<sup>71</sup>.  $\mathbf{e}$  is the residual term and  $\mathbf{e} \sim N(0, \mathbf{I}\sigma_e^2)$ , where  $\sigma_e^2$  is  
548 the residual variance component and  $\mathbf{I}$  is the  $n \times n$  identity matrix. After solving the linear mixed model,  
549 the marker effect was tested using the Wald test statistic  $W = \hat{a}^2 / \text{var}(\hat{a})$ , which approximately follows  
550 a  $\chi^2$ -distribution with one degree of freedom.

551 Strictly, the model needs to be fitted once for each marker to get the precise test statistic for each  
552 marker. But to reduce the computational load, we implemented a commonly used approximate  
553 approach, namely the “population parameters previously determined” (P3D) method<sup>72</sup>. That is, we only  
554 fit the model once without any marker effect (the so-called “null model”), and then we fixed the estimated  
555 the variance parameters  $\sigma_g^2$  and  $\sigma_e^2$  throughout the testing procedure. Then, the test statistic for each  
556 marker can be efficiently calculated. GWAS was implemented using R codes developed by ourselves.  
557 The variance parameters were estimated by the Bayesian method using the package BGLR<sup>73</sup>.

558 For microbial traits, the significant marker-trait association (MTA) was identified with a threshold of  $p$   
559  $< 0.05$  after Bonferroni-Holm correction for multiple test<sup>74</sup>. For fitness phenotypes and alpha-diversity,  
560 we used a more liberal threshold of  $p < 0.1$  after Benjamini-Hochberg correction<sup>75</sup>. For each trait, the  
561 proportion of phenotypic variance explained by each MTA ( $R^2$ ) was calculated as follows: A linear  
562 regression model was fitted with all MTAs identified for the trait under consideration. Then, the sum of  
563 squares for each MTA as well as the total sum of squares was calculated by ANOVA. The  $R^2$  for each  
564 MTA was estimated as the sum of squares of the MTA divided by the total sum of squares.

#### 565 **GWAS for the presence/absence mode**

566 For microbial traits, we performed in addition a GWAS based on the presence/absence mode (PA-  
567 GWAS) in each treatment. Each ASV or taxonomy is considered as present if it is present in more than  
568 two replicates (including two). As in the GWAS for abundance, ASVs and taxa with repeatability below  
569 0.1 were filtered out. Those with a presence rate above 95% or below 5% were considered as non-  
570 segregated and were also excluded from the analysis. The model for PA-GWAS is a logistic linear  
571 mixed model<sup>76</sup>. Briefly, the model can be described as follows.

572 
$$\text{logit}(\boldsymbol{\pi}) = \mathbf{X}\boldsymbol{\beta} + \mathbf{m}a + \mathbf{g}, \quad (5)$$

573 where  $\mathbf{X}$ ,  $\boldsymbol{\beta}$ ,  $\mathbf{m}$ ,  $a$  and  $\mathbf{g}$  are the same as in (6).  $\boldsymbol{\pi}$  is the vector of conditional probabilities given the  
574 covariates, marker effects and the genetic background effects. More precisely, for the  $i$ -th individual,  
575  $\pi_i = P(y_i = 1 | \mathbf{X}_i, m_i, g_i)$ , where  $y_i$  is the binary variable indicating the presence ( $y_i = 1$ ) and absence  
576 ( $y_i = 0$ ),  $\mathbf{X}_i$  is the  $i$ -th row of the matrix  $\mathbf{X}$ ,  $m_i$  is the  $i$ -th entry of the vector  $\mathbf{m}$  and  $g_i$  is the  $i$ -th component  
577 of the random vector  $\mathbf{g}$ . The logit function is defined as  $\text{logit}(x) = \ln(x/(1-x))$ .

578 Similar to the P3D approach, a null logistic linear mixed model  $\text{logit}(\boldsymbol{\pi}_0) = \mathbf{X}\boldsymbol{\beta} + \mathbf{g}$  was fitted using the  
579 penalized quasi-likelihood method<sup>77</sup>. The estimated variance components were then fixed throughout  
580 the test procedure. A score test was applied to assess the significance of the marker effects.

581 The PA-GWAS was conducted using the R package GMMAT<sup>76</sup>.

#### 582 **Prediction for microbial traits using the genomic data and environmental descriptors**

583 To see the host genetics and microbiome assemblage, Mantel test was first performed between Rogers'  
584 genetic distance matrix and microbial composition distance matrix only for landraces. After removing  
585 the treatment effect using linear model for  
586 normalized microbial abundances, the mean value of the residual for each  
587 genotype was used to calculate the Euclidean distance. Spearman correlation  
588 method was used in mantel function in R. Permutations = 9999.

589 Next, we investigated the prediction abilities for all microbial traits within each treatment using both the  
590 genomic data and the environmental characters. The following three models were implemented. To  
591 eliminate the noise of subpopulation effects, we only used the 97 landraces for this part of analysis.

592 *Model 1 (genomic prediction)*. We applied the genomic best linear unbiased prediction (GBLUP)<sup>71</sup> which  
593 is the most commonly used model in genomic prediction. The model can be described as follows.

$$594 \quad \mathbf{y} = \mathbf{X}\boldsymbol{\beta} + \mathbf{g} + \mathbf{e}, \quad (6)$$

595 where the notations are the same as in (4). Note that by the use of the VanRaden genomic relationship  
596 matrix as the covariance matrix of  $\mathbf{g}$ , it implicitly modeled the additive effects of all markers.

597 *Model 2 (prediction purely based on the environmental characters)*. In this model, the genetic effects  
598 were replaced by the effects of the environmental characters, which were modeled in a similar way to  
599 the GBLUP. More precisely, the model has the following form:

$$600 \quad \mathbf{y} = \mathbf{X}\boldsymbol{\beta} + \mathbf{l} + \mathbf{e}, \quad (7)$$

601 where  $\mathbf{l}$  is the  $n$ -dimensional random vector representing the E-determined values for all individuals.  
602 We assume that  $\mathbf{l} \sim N(0, \boldsymbol{\Sigma}\sigma_l^2)$  where  $\sigma_l^2$  is the corresponding variance component,  $\boldsymbol{\Sigma}$  is a covariance  
603 matrix. Assuming that  $\mathbf{L}$  is the  $n \times s$  matrix of standardized environmental character records ( $s$  is the  
604 number of environmental characters), we have  $\boldsymbol{\Sigma} = \mathbf{L}\mathbf{L}'/c$  where  $c$  is the mean of all diagonal elements  
605 in the matrix  $\mathbf{L}\mathbf{L}'$ .

606 *Model 3 (prediction based on both genomics and environmental characters)*. In this approach, we  
607 combined the genomic data and the Es in a multi-kernel model, which is of the following form:

$$608 \quad \mathbf{y} = \mathbf{X}\boldsymbol{\beta} + \mathbf{g} + \mathbf{l} + \mathbf{e}, \quad (8)$$

609 where the notations were inherited from (6) and (7).

610 The prediction abilities of the above three models were assessed in a leave-one-out cross-validation  
611 scenario. That is, each individual was predicted once using a training set consisting of all other  
612 individuals. Thus, for each trait the prediction model was fitted  $n$  times. After we obtained the predicted  
613 values of all individuals, the prediction ability was calculated as the correlation between the predicted  
614 and observed values. The standard error was estimated using the bootstrap approach<sup>78</sup>.

615 All prediction models were implemented using the R package BGLR<sup>73</sup> and rrBLUP<sup>79</sup>.

## 616 **Prediction for fitness phenotypes using the genomic and microbiome data**

617 We explored the possibility of predicting the three fitness phenotypes and ionome traits in each  
618 treatment using the genomic data and microbiomes. As in the last subsection, we focused on the  
619 subpopulation of 97 landraces.

620 *Scenario 1 (prediction based on microbiomes only)*. In this scenario, we considered 9 cases, in which  
621 the phenotypes were predicted using bacteria in the root sample (BA\_RO), in the rhizosphere sample  
622 (BA\_RH), fungi in the root sample (FU\_RO), in the rhizosphere sample (FU\_RH), bacteria in both  
623 samples (BA), fungi in both samples (FU), both types of microbiomes in the root sample (RO), in the  
624 rhizosphere sample (RH), and both types of microbiomes in both samples (ALL). The model can be  
625 uniformly described as follows:

$$626 \quad \mathbf{y} = \mathbf{1}_n\mu + \sum_{i=1}^k \mathbf{m}_i + \mathbf{e}, \quad (9)$$

627 where  $\mathbf{m}_i$  is an  $n$ -dimensional trait values for all individuals determined by a certain type of microbiome  
628 in a specific sample,  $k$  can be 1 (BA\_RO, BA\_RH, FU\_RO, FU\_RH), 2 (BA, FU, RO, RH), or 4 (ALL),  
629 other notations are the same as in (8). We assume that  $\mathbf{m}_i \sim N(0, \mathbf{V}_i\sigma_{m_i}^2)$ , where  $\sigma_{m_i}^2$  is the corresponding  
630 variance component,  $\mathbf{V}_i$  is a covariance matrix derived from the microbiome ASVs. Assuming that  $\mathbf{M}_i$   
631 is the  $n \times t$  matrix of standardized records of microbiome ASVs ( $t$  is the number of different ASVs), we  
632 have  $\mathbf{V}_i = \mathbf{M}_i\mathbf{M}_i'/c_i$  where  $c_i$  is the mean of all diagonal elements in the matrix  $\mathbf{M}_i\mathbf{M}_i'$ .

633 *Scenario 2 (prediction based on both microbiomes and genomic data)*. In this scenario, the 9 cases in  
634 Scenario 1 were combined with genomic data (G\_BA\_RO, G\_BA\_RH, G\_FU\_RO, G\_FU\_RH, G\_BA,  
635 G\_FU, G\_RO, G\_RH, G\_ALL). The models are of the following form:

$$636 \quad \mathbf{y} = \mathbf{1}_n\mu + \mathbf{g} + \sum_{i=1}^k \mathbf{m}_i + \mathbf{e}, \quad (10)$$

637 where the notations were adopted from (8) and (11).

638 As in the last subsection, the prediction abilities were evaluated in a leave-one-out cross-validation  
639 scenario. Prediction models were implemented using the R package BGLR.

## 640 **Effects of source environmental factors on specific microbial assemblies**

641 To explore the environmental legacy of native habitats in relation to specific microbial variations among  
642 landraces, we performed network analyses of rhizosphere and root microbial indicators. We then aimed  
643 to understand the connections between bacterial and fungal taxa intimately associated with the  
644 microbiome of roots and rhizospheres. To this end, we used the function “multipatt” in the R package  
645 *indicspecies*<sup>80</sup> to identify those microbial phylotypes that were significant indicators of microbial zASVs  
646 roots and rhizosphere (i.e., roots, rhizosphere or roots + rhizosphere) compared with bulk soil. We then  
647 conducted a correlation network conformed by taxa associated with the root and rhizosphere  
648 microbiomes. We calculated all pairwise Spearman correlation coefficients among these microbial taxa  
649 and kept all positive correlations. We further identified microbial modules (clusters of taxa highly  
650 correlated with each other) using Gephi (<https://gephi.org/>). We determined the proportion of modules  
651 by calculating the standardized (0-1) average of all taxa within each module, so that all taxa equally  
652 contribute to each module. This information was then correlated (Spearman) with environmental  
653 conditions. Mean annual temperature and precipitation were obtained from the WorldClim database  
654 (<https://www.worldclim.org/>). Other environmental descriptors were determined as explained above.  
655 Structural equation modelling (SEM) was conducted to provide a system-level understanding on the  
656 direct and indirect associations between environmental factors, the proportion of modules and that of  
657 selected taxa from above-explained analyses. Because some of the variables introduced were not  
658 normally distributed, we used bootstrap tests in these SEMs. We evaluated the fit of these models using  
659 the model  $\chi^2$ -test, the root mean squared error of approximation and the Bollen–Stine bootstrap test.

## 660 **Environmentally adaptive loci and microbiome relatedness across abiotic stresses**

661 To determine if the environmentally associated loci are contributing to microbiome adaptation to abiotic  
662 stresses, we used a representative set of natural varieties e.g. 97 landraces accessions covering typical  
663 geographical range. Prior to analysis, PCA was conducted based on the BLUEs for each treatment and  
664 compartment to extract major sources of variance from bacterial and fungal microbial community data.  
665 The first five PCs were obtained for downstream analyses. PCA was performed using the *prcomp*  
666 function in R. In addition, we selected 18 individual ASVs belonging to *Oxalobacteraceae* to be  
667 predicted by Random Forest models. To improve model accuracy, feature selection was conducted  
668 prior to model building to eliminate unimportant or redundant environmental variables by identifying  
669 those with significant associations to an outcome variable. The feature selection method Boruta was  
670 employed to identify environmental aspects that describe significant variation in the PCs and ASVs  
671 using *Boruta::boruta()* (v7.0.0)<sup>81</sup>.

672 The subset of boruta-identified environmental variables (Supplementary Dataset 12) for each ASV were  
673 used for Random Forest model construction. This model works under the expectation that a response  
674 variable can be described by several explanatory variables through the construction of decision trees.  
675 Thus, each Random Forest model is representative of the non-linear, unique combination of explanatory  
676 variables that describe variation in a response variable. Random Forest models were built using  
677 *RandomForest::randomForest()* function under default parameters, 5000 trees were built and one third  
678 of the number of explanatory variables were tried at each split<sup>82</sup>. Random Forest models were trained  
679 with 80% of the data and validated with the remaining 20% test set. Model success was evaluated with  
680 percent error explained, Nash-Sutcliffe efficiency (NSE), mean absolute error (MAE), and mean  
681 squared error (MSE). Using constructed Random Forest models, ASVs were predicted for 1,781  
682 genotyped landraces in Mexico. These landraces were genotyped as a part of the Seeds of Discovery  
683 project (Seed).

684 We conducted genome wide association studies (GWAS) to measure the associations between SNPs  
685 of landrace genotypes and predicted microbial traits, as well as the associations between SNPs and  
686 the environmental variables used to predict the microbial traits. SNPs were filtered for minor allele  
687 frequency >1%. We applied the method as previously described<sup>83</sup>, using a linear model to fit the  
688 genotypic data and each microbial trait and environmental variable for Mexican landrace accessions.  
689 The first five eigenvectors of the genetic relationship matrix were included in the model to control for  
690 population structure. To control for the number of false positive tests, we re-calibrated the *p*-values  
691 using the false discovery rate (FDR) control algorithm<sup>84</sup> and selected significant SNPs based on the  
692 calibrated results. To test if GWA hits based on the prediction is significantly better in capturing top  
693 GWA hits of observed data than random, we conducted a permutation test and compared the median  
694 *p*-value of GWA hits of observed data that are around 200kb of the top 100 prediction-based GWA hits  
695 and the median *p*-value of random selected GWA hits based on 10000 permutations.

## 696 **Association of adaptive alleles with soil nitrogen and co-adapted microbial taxa**

697 To identify whether the microbiome has been locally adapted with environment and maize phenotypes,  
698 we performed allelic variation analysis of Zm00001d048945 using an SNP dataset of CIMMYT  
699 landraces accessions obtained from a previous study<sup>12</sup>. We extracted the genotypic information of top  
700 SNPs of the target gene Zm00001d048945 for all tested landraces. We divided maize landraces into  
701 20 groups based on the total soil nitrogen content (%) of their sampling sites<sup>48</sup>. We calculated the mean  
702 total nitrogen, the minor allele frequencies (MAF) of the target SNPs, and the mean predicted ASV  
703 abundance for each group of landraces. Pearson correlation was conducted to test the correlations  
704 between MAF and total nitrogen content, and between MAF and ASV abundance.

#### 705 **Candidate gene validation by independent transposon insertion alleles**

706 Gene expression for Zm00001d048945 was explored in qTeller (<https://qteller.maizegdb.org/>), which  
707 allows to compare gene expression across different tissues from multiple data sources. Gene  
708 expression data was extracted from different organs (seed, root, tassel/silk, internodes and leaf) and  
709 specific tissues such as the root meristematic zone, elongation zone, stele and cortex. The gene  
710 encoded protein annotation was inferred from UniProt database (<https://www.uniprot.org/>). We next  
711 identified potential loss-of-function mutations by exploring the sequence indexed collection BonnMu<sup>85</sup>.  
712 Induced maize mutants of the BonnMu resource derive from Mutator-tagged F<sub>2</sub>-families in various  
713 genetic backgrounds, such as B73 and F7. We identified two insertion lines, BonnMu-8-D-0170 (B73)  
714 and BonnMu-F7-2-F-0598 (F7), harboring insertions 1,264 bp upstream of the start codon ATG and in  
715 the second exon of Zm00001d048945, respectively. These two families were phenotyped in paper-roll  
716 culture<sup>18</sup> and the seedling plants were scanned using the scanner Expression 12000XL (Epson, Suwa,  
717 Japan). Lateral roots were counted and the density was normalized with the measure number of lateral  
718 roots per cm length of primary root. Statistical analyses were performed by pair-wise Students *t* test  
719 with *F* statistics.

#### 720 **Association of relative abundance of *Massilia* with lateral root density**

721 To understand the relationship between *Massilia* and the formation of lateral roots, root system  
722 architecture and morphology of 129 maize genotypes was scanned with an Epson Expression 12000XL  
723 scanner. Lateral root density was determined by manual calculation as the number of emerged lateral  
724 roots per length (cm) of the main root. The linear correlation was plotted between lateral root density  
725 and relative abundance data of *Massilia* ASVs using R (v4.1.0).

#### 726 **Functionally adapted microbial inheritance from inbred lines to hybrids**

727 Patterns of heterosis were tested for variance-stabilized counts of highly abundant and prevalent ASVs  
728 (>0.05% relative abundance  $\geq$ 20% samples) for 11 maize inbred lines and 10 hybrids that were crossed  
729 with one common mother inbred line B73 according to established protocols<sup>37</sup>. A linear mixed model  
730 was employed to test these ASVs features using lmer function from the lme4 (v1.1.27.1)<sup>86</sup> package in  
731 R. In the model, blocks were set as random effects while treatments were set as fixed effects to remove  
732 noise. The resulted residuals were then used to test for patterns of heterosis. In brief, the mean values  
733 of these residuals in the inbred lines and expected mid-parent values (assuming additive genetic  
734 variance) for each hybrid were calculated for each ASV feature. Two-sided statistical *t*-tests were  
735 conducted for the null hypothesis that each hybrid's microbiome trait value was equivalent to its  
736 respective "mid-parent heterosis". Moreover, "better-parent heterosis" was tested using one-sided *t*-  
737 tests to assess whether the hybrid value fell outside the parental range. Significance of both tests were  
738 adjusted according to the Benjamini-Hochberg method (adjusted *p* values <0.05)<sup>75</sup>.

#### 739 **Synthetic community, root bacterial inoculation and plant fitness assay**

740 To explore heterosis manifestation and effects of *Oxalobacteraceae*, a growth promotion assay by  
741 inoculation with a synthetic community of *Oxalobacteraceae* isolates (Supplementary Dataset 25) was  
742 performed on three maize inbred lines (H84, B73 and Mo17) and their reciprocal hybrids (B73 × H84,  
743 B73 × Mo17 and Mo17 × H84) in both nitrogen-rich and nitrogen-poor soil pots. The natural soil was  
744 dug from a natural field at Campus Klein-Altendorf (University of Bonn), then sieved, homogenized and  
745 mixed with 50% quartz sand (WF 33, Quarzwerke Weferlingen, Germany) to reduce the nitrogen  
746 content of the recipient soil. The soil mixtures were then sterilized and conditioned for one week prior  
747 to use. The seed sterilization, isolates preparation, root inoculation and growth assay were done  
748 according as previously reported<sup>18</sup>. Different genotypes were grown in the phytochamber (16/8 h  
749 light/dark and 26/18 °C) for 6 weeks and plants were harvested, and total root and shoot dry weight  
750 were determined. To understand the importance of *Massilia* strains for maize heterosis, we performed  
751 another inoculation experiment using the same maize inbred lines and hybrids with different synthetic  
752 communities e.g. all *Oxalobacteraceae* isolates, *Oxalobacteraceae* isolates excluding *Massilia* ASV37,

753 only *Massilia* ASV37 isolates under nitrogen-poor condition. All preparations and harvests were  
754 performed accordingly<sup>18</sup>.

755 **Data availability**

756 All raw maize genotyping data, bacterial 16S and fungal ITS data in this paper were deposited in the  
757 Sequence Read Archive (<http://www.ncbi.nlm.nih.gov/sra>) under the BioProject ID PRJNA889703. The  
758 SSUrRNA database from SILVA database (release 138, 2020, <https://www.arb-silva.de/>) and UNITE  
759 database (v8.3, 2021, <https://unite.ut.ee/>) were used for analysing the bacterial 16S and fungal ITS  
760 sequences, respectively. We deposited customized scripts about GWAS analysis in the following  
761 GitHub repository: <https://github.com/Danning16/MaizeMicrobiome2022>. All statistical data are  
762 provided with this paper.



763 **Main figures**

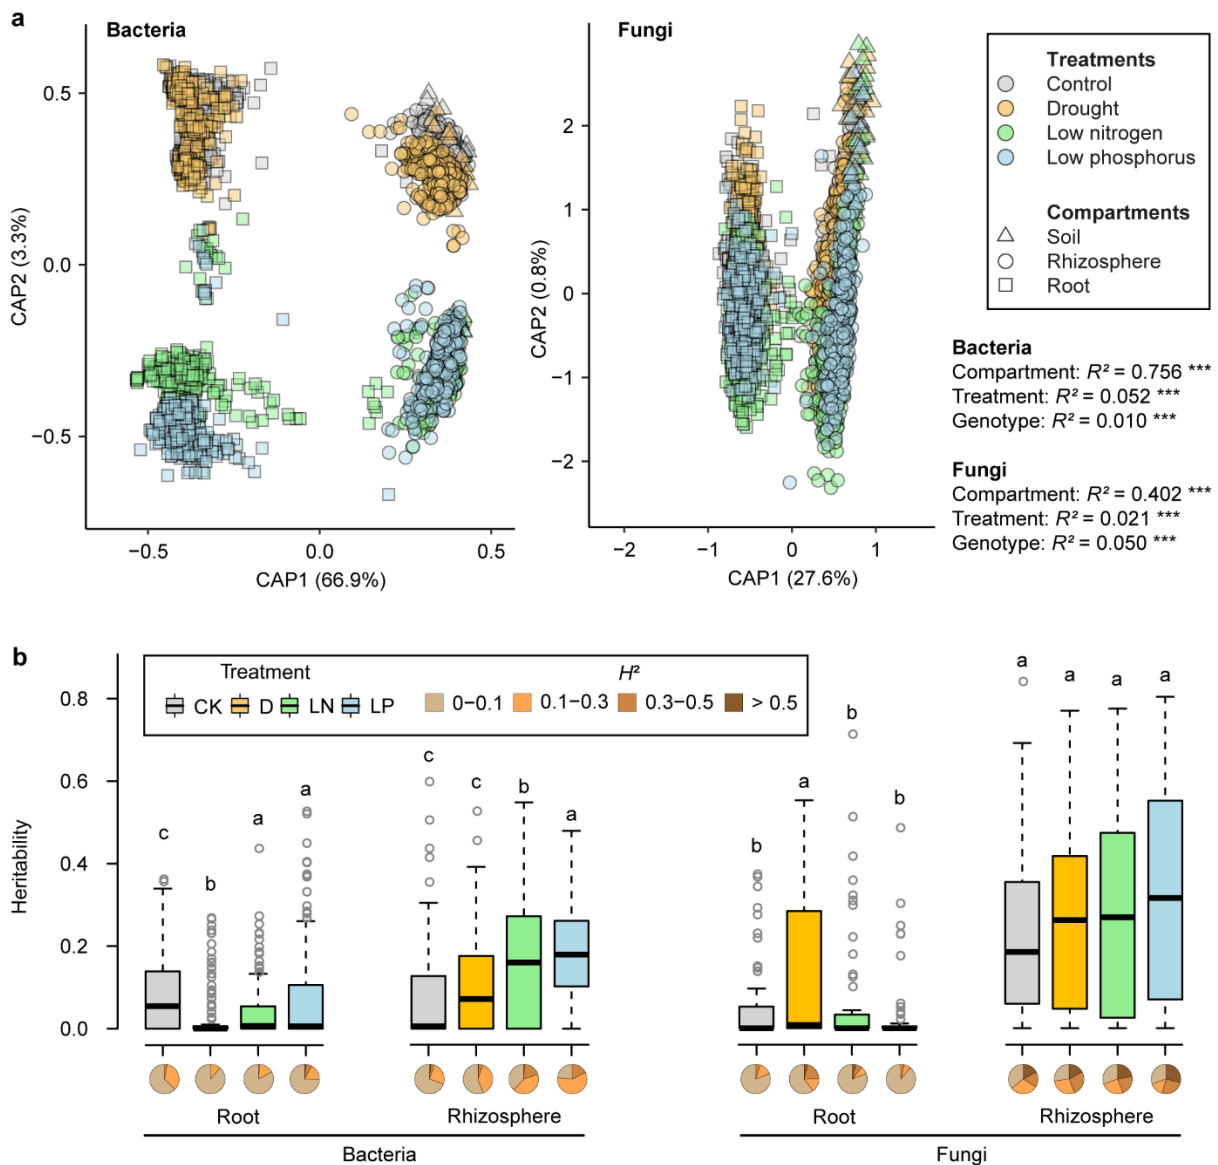

764  
 765 **Figure 1. Overall assembly and heritability of microbiome among abiotic stresses.** **a**, Constrained  
 766 analysis of principle coordinate (CAP) ordination using Bray–Curtis dissimilarity with permutational  
 767 analysis of variance (PERMANOVA) was applied to visualize significant microbiome differences across  
 768 three compartments, four treatments and genotypes ( $n = 129$ ). Datapoints for bacteria ( $n = 3138$ ) and  
 769 fungi ( $n = 3168$ ) are color coded according to the four treatments. Compartments are shape coded.  
 770 Only ASVs with reads  $>10$  in  $\geq 6$  samples were included in the dataset. **b**, Heritability estimates of  
 771 individual families under four treatments for both bacteria and fungi. The broad-sense heritability ( $H^2$ )  
 772 was calculated using highly abundant bacterial ( $n = 131$ ) and fungal ( $n = 59$ ) families across all samples.  
 773 CK, control; D, drought; LN, low nitrogen; LP, low phosphorus. Significances are indicated among  
 774 treatment groups for each compartment with Benjamini-Hochberg adjusted  $P < 0.05$  (Kruskal-Wallis  
 775 test, Dunn's *post-hoc* test). Boxes span from the first to the third quartiles, centre lines represent the  
 776 median values and whiskers show data lying within  $1.5\times$  interquartile range of the lower and upper  
 777 quartiles. Data points at the ends of whiskers represent outliers. The pie charts indicate the proportional  
 778 distributions of heritability frequencies.

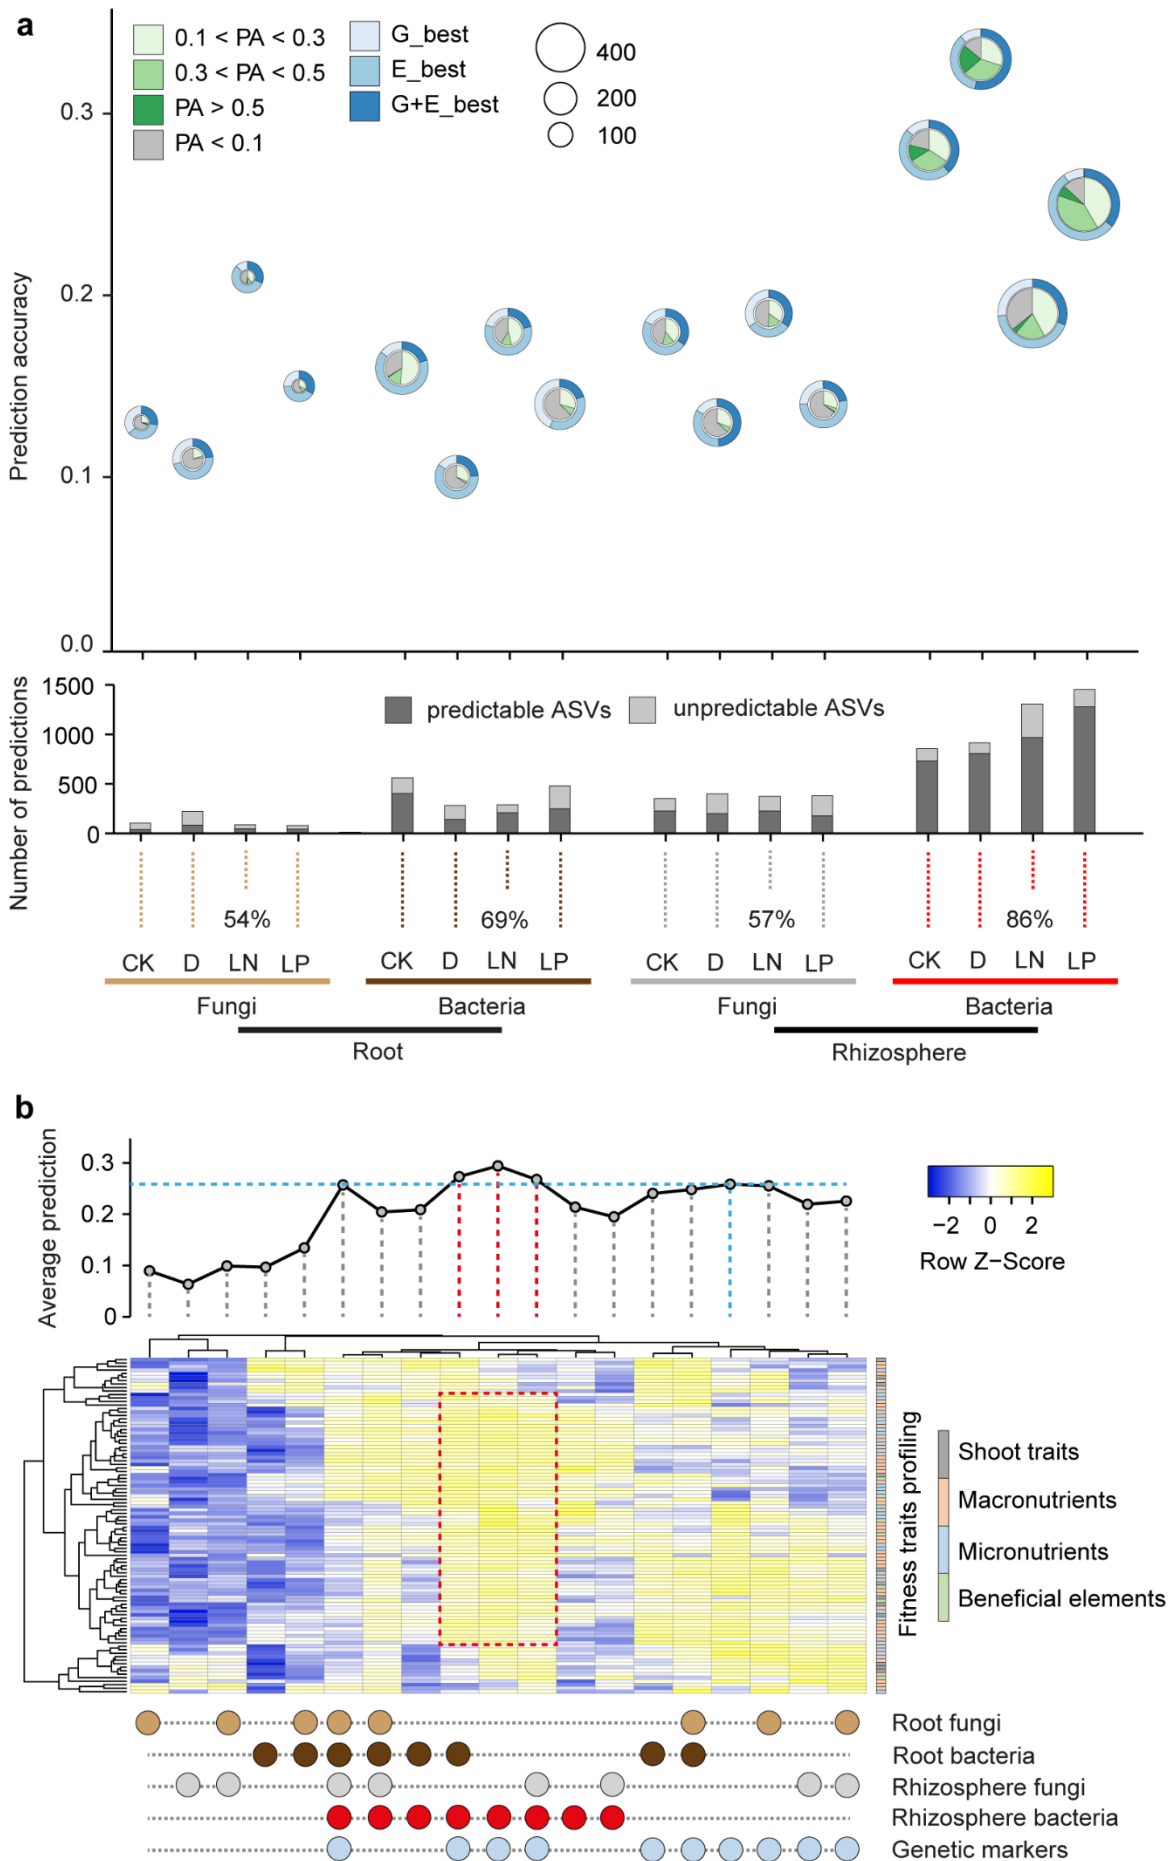

780 **Figure 2. Genomic, environmental and microbial prediction of host-microbe interactions and**  
781 **plant fitness. a,** Microbiome traits prediction using genetic markers and environmental characters.  
782 Inner pie charts describe the proportion of ASVs with four different magnitudes of prediction accuracies  
783 from different treatments across compartments. Outer circles define the best prediction patterns  
784 observed by applying the genetic markers (G\_best) alone, environmental characters (E\_best) alone or  
785 combined genetic markers and environmental characters (G+E\_best). The numbers denote the  
786 average prediction accuracies for microbial ASVs from different treatments across compartments. Only  
787 ASVs with heritability ( $H^2$ ) >0.1 were considered in prediction analysis. PA, prediction accuracy. Bar  
788 plots indicate the proportions of predictable (PA >0.1) and unpredictable (PA <0.1) ASVs from the total  
789 predictions. CK, control; D, drought; LN, low nitrogen; LP, low phosphorus. **b,** Plant fitness traits  
790 prediction using genetic markers and microbiome traits. A curved line describes the average prediction  
791 accuracy for plant fitness traits using microbiome data alone, genomic data alone or combined genomic  
792 and microbiome traits data. A heatmap illustrates the standardized prediction accuracy for fitness traits  
793 across different microbiome features combined with genetic markers. Shoot traits include the biomass,  
794 leaf area and chlorophyll measured by SPAD value. Nutrient uptake properties include the  
795 concentration and content of macronutrients, micronutrients and beneficial elements.

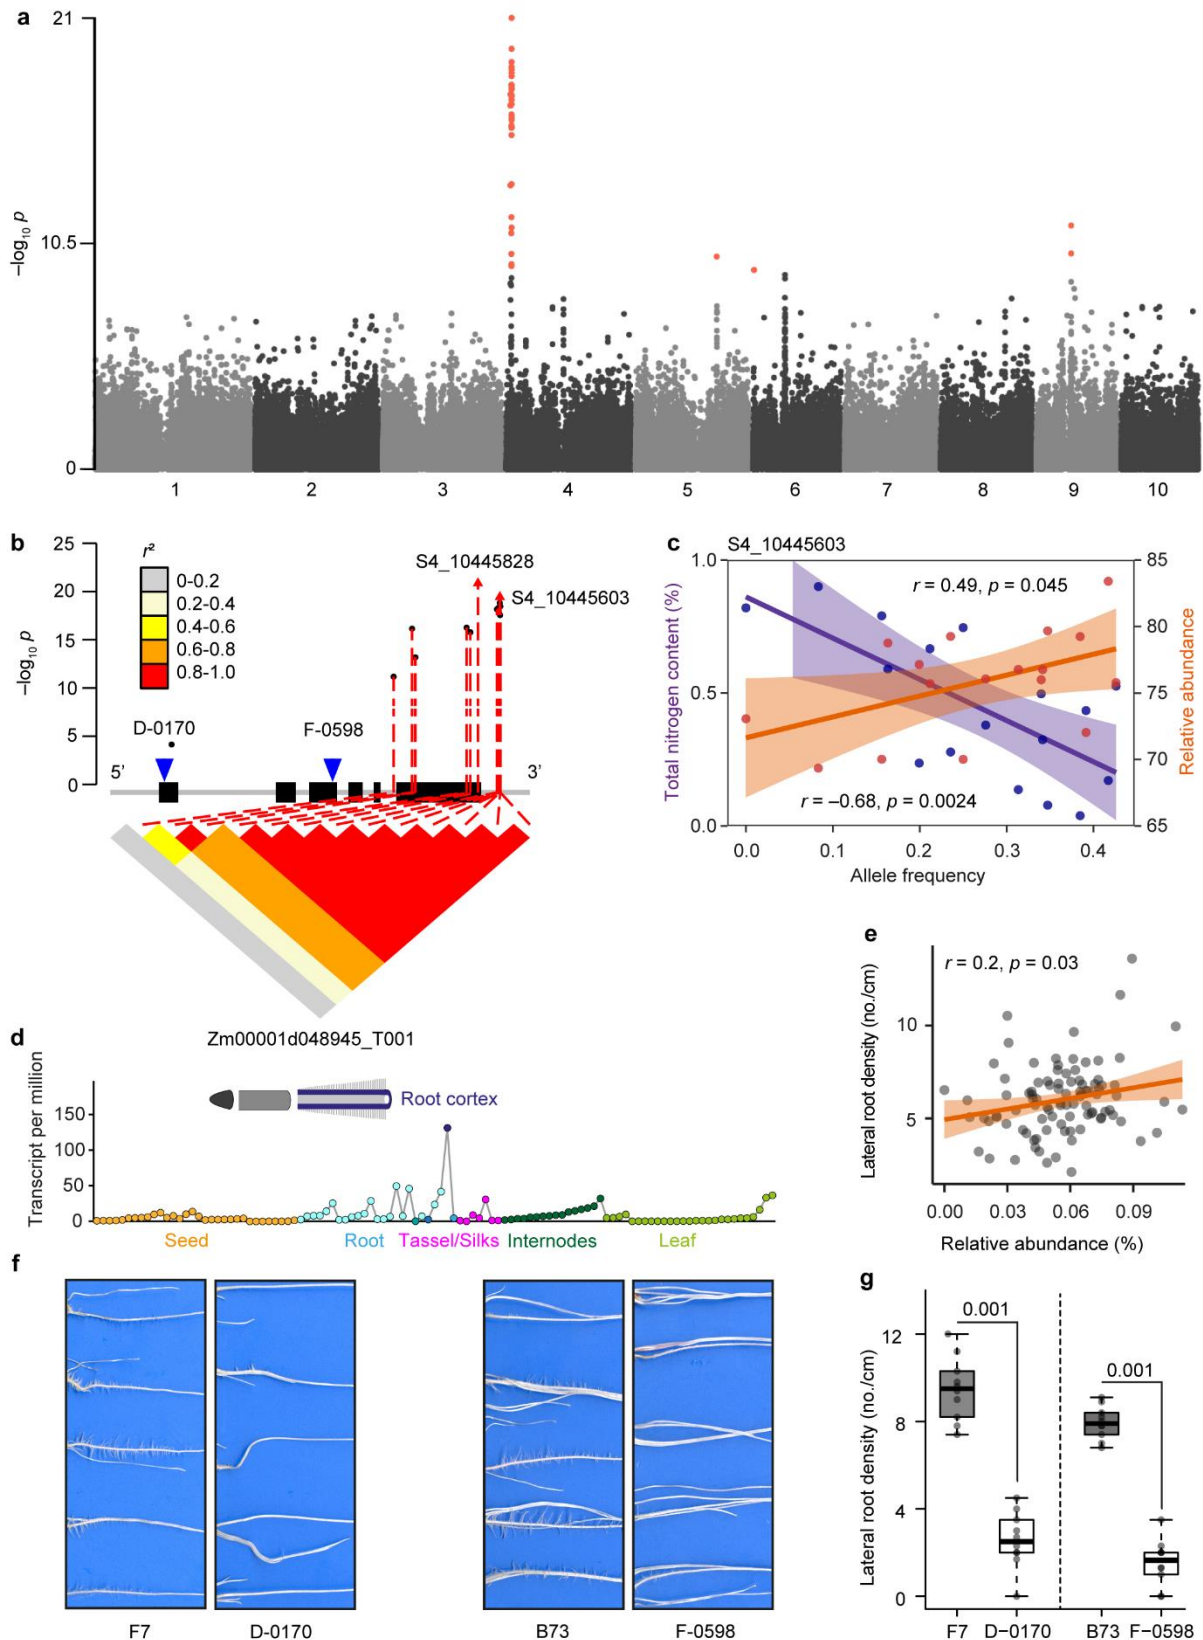

796  
797  
798  
799  
800  
801  
802  
803

**Figure 3. Environmental selection facilitates microbiome-driven root phenotypic co-adaptation to local nitrogen availability.** **a**, Manhattan plots showing environmental GWAS of adaptive of specific *Massilia* ASV37. **b**, Linkage disequilibrium (LD) plot for SNPs within 2.5kb of gene Zm00001d048945. Exons in the gene model are indicated by black bins. All significant SNPs are linked (red) to the LD plot ( $P < 1.0 \times 10^{-7}$ ). Arrows indicate the positions of the peak SNPs. The colour key (grey to red) represents linkage disequilibrium values ( $r^2$ ). Blue triangles indicate the transposon insertion positions of the two mutant alleles D-0170 and F-0598. **c**, Pearson correlation coefficient analysis of allele frequency

804 (S4\_10445603) with soil total nitrogen content (purple) and predicted relative abundance of  
805 ASV37\_Root\_LN (orange) across 1781 geographical locations worldwide. **d**, Tissue-specific  
806 expression of gene Zm00001d048945 according to the eFP Browser database. **e**, Pearson correlation  
807 coefficient analysis of lateral root density with relative abundance of ASV37\_Root\_LN (orange) among  
808 97 maize landraces. Scatter plots show best fit (solid line) and 95% confidence interval (colour shading)  
809 for linear regression. **f** and **g**, Root phenotypes and lateral root density of two independent Mu-  
810 transposon insertion mutant alleles in comparison to the corresponding wild types (B73 and F7).  
811 Significances are indicated between wild type and mutant for different genetic backgrounds (two-tailed  
812 Student's *t*-tests). Boxes span from the first to the third quartiles, centre lines represent the median  
813 values and whiskers show data lying within 1.5x interquartile range of the lower and upper quartiles.  
814 Data points at the ends of whiskers represent outliers.

815

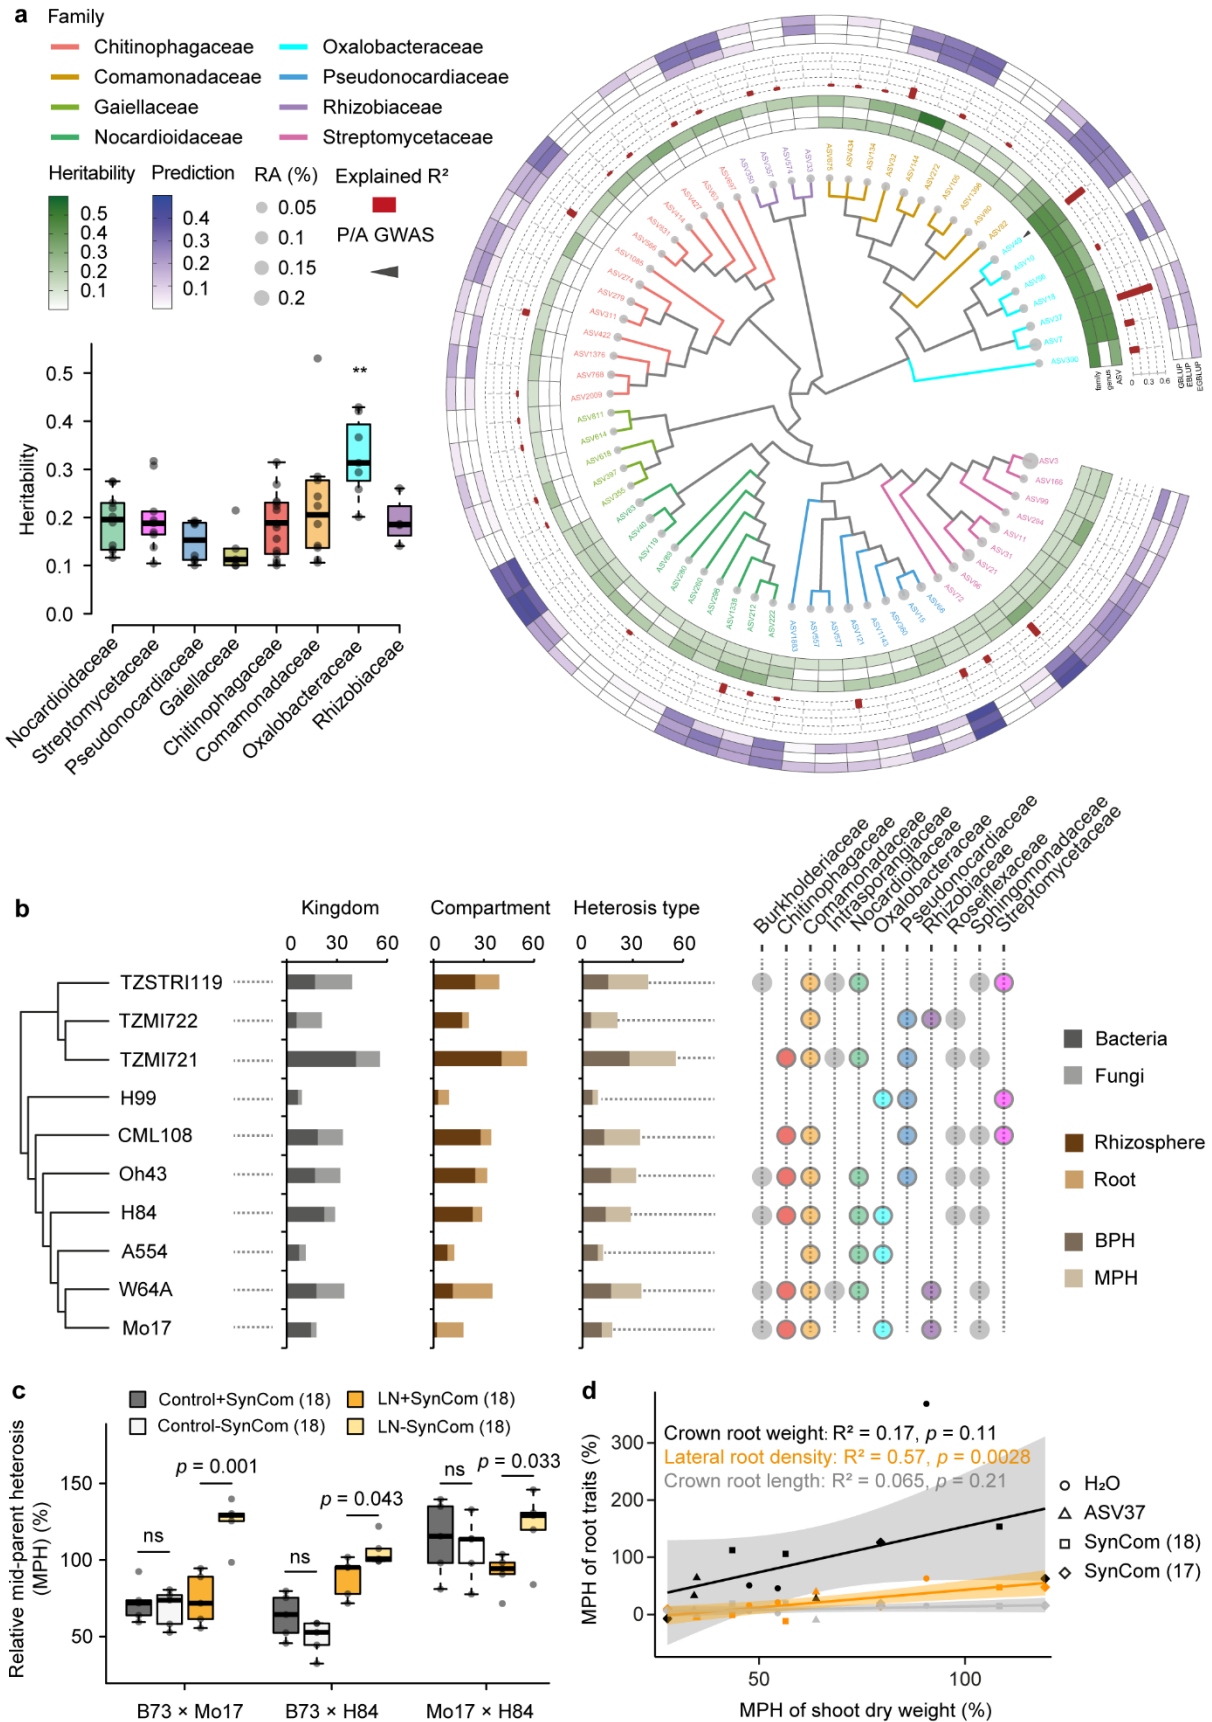

816

817 **Figure 4. Heterosis confers selective advantage of functional taxa and overall performance**  
818 **under nitrogen deficiency.** a, Phylogenetic tree of dominant bacterial ASVs ( $n = 126$ ) of roots grown  
819 under nitrogen-poor condition. Dot size corresponds to relative abundance. Inner heatmap from inside

820 to outside indicates heritability ( $H^2 > 0.1$ ) at the family, genus and ASV level. Red bar plots describe the  
821 explained variance by GWAS. The outer heatmap indicates the predictions by genomic best linear  
822 unbiased prediction (GBLUP), or based on the environmental best linear unbiased prediction (EBLUP)  
823 or prediction based on both genomics and environment (EGBLUP). Triangles indicate significant  
824 associations with the presence/absence (P/A) GWAS. Color coded tree branches of ASVs are clustered  
825 at the family level. Box plot indicates significantly higher heritability of *Oxalobacteraceae* compared to  
826 other families. **b**, Heterosis pattern of microbial ASVs across different crossing triplets. BPH, better  
827 parent heterosis; MPH, mid-parent heterosis. Different color-coded dots correspond to the bacterial  
828 families described in panel **a**. **c**, MPH of shoot dry biomass in the presence/absence of synthetic  
829 *Oxalobacteraceae* communities (SynCom). Significances are indicated in response to  
830 presence/absence of SynCom (two-tailed Student's *t*-tests). ns, not significant. LN, low nitrogen. **d**,  
831 Correlation between MPH of different root traits and MPH of shoot dry biomass after inoculation with  
832 independent soil-derived *Oxalobacteraceae* isolates in nitrogen-poor soil. Scatter plots show combined  
833 data from inoculation experiments with best fit (solid line) and 95% confidence interval (color shading)  
834 for linear regression.

835 **Acknowledgement**

836 We thank Paul Schulze-Lefert (Max Planck Institute for Plant Breeding Research, Cologne, Germany)  
837 for the generous donation of bacterial strains for SynCom experiments. We thank Candice Gardner  
838 (United States Department of Agriculture, Ames, US) and the International Maize and Wheat  
839 Improvement Center (CIMMYT) for germplasm contribution. We thank Angelika Glogau, for soil and  
840 plant nutrient determination and Selina Siemens and Alexa Brox for soil and root DNA extractions  
841 (University of Bonn, Bonn, Germany). We thank Yayu Wang and Huan Liu (State Key Laboratory of  
842 Agricultural Genomics, BGI-Shenzhen, Shenzhen, China) for providing us the SNP matrix data in foxtail  
843 millet. We thank Daliang Ning and Jizhong Zhou (University of Oklahoma, Norman, USA) for  
844 suggestions on the microbiome data analysis. This work is supported by Deutsche  
845 Forschungsgemeinschaft (DFG) grants HO2249/9-3, HO2249/12-1 to F.H. and YU272/1-1 and Emmy  
846 Noether Programme 444755415 to P.Y., the German Excellence Strategy – EXC 2070 – grant  
847 390732324 to P.Y. and G.S., the Bundesministerium für Bildung und Forschung (BMBF) grant  
848 031B195C to F.H. and DFG Priority Program (SPP2089) “Rhizosphere Spatiotemporal Organisation -  
849 a Key to Rhizosphere Functions” grant 403671039 to F.H. and P.Y. X.C.’s research is supported by  
850 The Changjiang Scholarship, Ministry of Education, China, State Cultivation Base of Eco-agriculture for  
851 Southwest Mountainous Land (Southwest University, Chongqing, China), and the National Maize  
852 Production System in China (grant no. CARS-02-15).



853 **Main references**

854

- 855 1. Cheng, Y. T., Zhang, L. & He, S. Y. Plant-microbe interactions facing environmental  
856 challenge. *Cell Host Microbe* **26**, 183–192 (2019).
- 857 2. Oldroyd, G. E. & Leyser, O. A plant's diet, surviving in a variable nutrient environment.  
858 *Science* **368**, eaba0196 (2020).
- 859 3. Singh, B. K., Trivedi, P., Egidi, E., Macdonald, C. A. & Delgado-Baquerizo, M. Crop  
860 microbiome and sustainable agriculture. *Nat. Rev. Microbiol.* **18**, 601–602 (2020).
- 861 4. Trivedi, P., Leach, J. E., Tringe, S. G., Sa, T. & Singh, B. K. Plant-microbiome interactions:  
862 from community assembly to plant health. *Nat. Rev. Microbiol.* **18**, 607–621 (2020).
- 863 5. Meyer, R. S. & Purugganan, M. D. Evolution of crop species: genetics of domestication and  
864 diversification. *Nat. Rev. Genet.* **14**, 840–852 (2013).
- 865 6. Cordovez, V., Dini-Andreote, F., Carrión, V. J. & Raaijmakers, J. M. Ecology and evolution  
866 of plant microbiomes. *Annu. Rev. Microbiol.* **73**, 69–88 (2019).
- 867 7. Fitzpatrick, C. R. et al. The plant microbiome: from ecology to reductionism and beyond.  
868 *Ann. Rev. Microbiol.* **74**, 81–100 (2020).
- 869 8. Raaijmakers, J. M. & Kiers, E. T. Rewilding plant microbiomes. *Science* **378**, 599–600  
870 (2022).
- 871 9. Haney, C. H., Samuel, B. S., Bush, J. & Ausubel, F. M. Associations with rhizosphere  
872 bacteria can confer an adaptive advantage to plants. *Nat. Plants.* **1**, 15051 (2015).
- 873 10. de Vries, F. T., Griffiths, R. I., Knight, C. G., Nicolitch, O. & Williams, A. Harnessing  
874 rhizosphere microbiomes for drought-resilient crop production. *Science* **368**, 270–274  
875 (2020).
- 876 11. Hake, S. & Ross-Ibarra, J. The natural history of model organisms: genetic, evolutionary  
877 and plant breeding insights from the domestication of maize. *eLife* **4**, e05861 (2015).
- 878 12. Navarro, J. A. R. et al. A study of allelic diversity underlying flowering-time adaptation in  
879 maize landraces. *Nat. Genet.* **49**, 476–480 (2017).
- 880 13. Bulgarelli, D. et al. Revealing structure and assembly cues for *Arabidopsis* root-inhabiting  
881 bacterial microbiota. *Nature* **488**, 91 (2012).
- 882 14. Lundberg, D. S. et al. Defining the core *Arabidopsis thaliana* root microbiome. *Nature* **488**,  
883 86 (2012).
- 884 15. Bulgarelli, D., Schlaeppi, K., Spaepen, S., Van Themaat, E. V. L. & Schulze-Lefert, P.  
885 Structure and functions of the bacterial microbiota of plants. *Ann. Rev. Plant Biol.* **64**, 807–  
886 838 (2013).
- 887 16. Banerjee, S., Schlaeppi, K. & van der Heijden, M. G. Keystone taxa as drivers of  
888 microbiome structure and functioning. *Nat. Rev. Microbiol.* **16**, 567–576 (2018).
- 889 17. Durán, P. et al. Microbial interkingdom interactions in roots promote *Arabidopsis* survival.  
890 *Cell* **175**, 973–983 (2018).
- 891 18. Yu, P. et al. Plant flavones enrich rhizosphere Oxalobacteraceae to improve maize  
892 performance under nitrogen deprivation. *Nat. Plants* **7**, 481–499 (2021).
- 893 19. Deng, S. et al. Genome wide association study reveals plant loci controlling heritability of  
894 the rhizosphere microbiome. *ISME J.* **15**, 3181–3194 (2021).
- 895 20. Escudero-Martinez, C. et al. Identifying plant genes shaping microbiota composition in the  
896 barley rhizosphere. *Nat. Commun.* **13**, 1–14 (2022).
- 897 21. Meier, M. A. et al. Association analyses of host genetics, root-colonizing microbes, and  
898 plant phenotypes under different nitrogen conditions in maize. *eLife* **11**, e75790 (2022).
- 899 22. Oyserman, B. O. et al. Disentangling the genetic basis of rhizosphere microbiome  
900 assembly in tomato. *Nat. Commun.* **13**, 1–16 (2022).
- 901 23. Wang, Y. et al. GWAS, MWAS and mGWAS provide insights into precision agriculture  
902 based on genotype-dependent microbial effects in foxtail millet. *Nat. Comm.* **13**, 1–17  
903 (2022).
- 904 24. Levy, A. et al. Genomic features of bacterial adaptation to plants. *Nat. Genet.* **50**, 138–150  
905 (2018).
- 906 25. Batstone, R. T., O'Brien, A. M., Harrison, T. L. & Frederickson, M. E. Experimental evolution  
907 makes microbes more cooperative with their local host genotype. *Science* **370**, 476–478  
908 (2020).
- 909 26. Brachi, B. et al. Plant genetic effects on microbial hubs impact host fitness in repeated field  
910 trials. *Proc. Natl Acad. Sci. USA* **119**, e2201285119 (2022).
- 911 27. Ramirez, K. S. et al. Detecting macroecological patterns in bacterial communities across  
912 independent studies of global soils. *Nat. Microbiol.* **3**, 189–196 (2018).

- 913 28. Walters, W. A. et al. Large-scale replicated field study of maize rhizosphere identifies  
914 heritable microbes. *Proc. Natl Acad. Sci. USA* **115**, 7368–7373 (2018).
- 915 29. Yuen, C. Y., Pearlman, R. S., Silo-Suh, L., Hilson, P., Carroll, K. L. & Masson, P. H. WVD2  
916 and WDL1 modulate helical organ growth and anisotropic cell expansion in Arabidopsis.  
917 *Plant Physiol.* **131**, 493–506 (2003).
- 918 30. Qian, Y., Wang, X., Liu, Y., Wang, X., Mao, T. HY5 inhibits lateral root initiation in  
919 Arabidopsis through negative regulation of the microtubule-stabilizing protein TPXL5. *Plant*  
920 *Cell* doi: 10.1093/plcell/koac358 (2022).
- 921 31. Yu, P., Gutjahr, C., Li, C. & Hochholdinger, F. Genetic control of lateral root formation in  
922 cereals. *Trends Plant Sci.* **21**, 951–961 (2016).
- 923 32. Hochholdinger, F., Yu, P. & Marcon, C. Genetic control of root system development in  
924 maize. *Trends Plant Sci.* **23**, 79–88 (2018).
- 925 33. Finkel, O. M. et al. A single bacterial genus maintains root development in a complex  
926 microbiome. *Nature* **587**, 103–108 (2020).
- 927 34. Zhang, J. et al. NRT1.1B is associated with root microbiota composition and nitrogen use  
928 in field-grown rice. *Nat. Biotechnol.* **37**, 676–684 (2019).
- 929 35. Szoboszlay, M., Lambers, J., Chappell, J., Kupper, J. V., Moe, L. A. & McNear Jr, D. H.  
930 Comparison of root system architecture and rhizosphere microbial communities of Balsas  
931 teosinte and domesticated corn cultivars. *Soil Biol. Biochem.* **80**, 34–44 (2015).
- 932 36. Brisson, V. L., Schmidt, J. E., Northen, T. R., Vogel, J. P. & Gaudin, A. Impacts of maize  
933 domestication and breeding on rhizosphere microbial community recruitment from a  
934 nutrient depleted agricultural soil. *Sci. Rep.* **9**, 1–14 (2019).
- 935 37. Wagner, M. R., Roberts, J. H., Balint-Kurti, P. & Holland, J. B. Heterosis of leaf and  
936 rhizosphere microbiomes in field-grown maize. *New Phytol.* **228**, 1055–1069 (2020).
- 937 38. Favela, A., Bohn, M. O. & Kent, A. D. Maize germplasm chronosequence shows crop  
938 breeding history impacts recruitment of the rhizosphere microbiome. *ISME J.* **15**, 2454–  
939 2464 (2021).
- 940 39. Pérez-Jaramillo, J. E., Mendes, R. & Raaijmakers, J. M. Impact of plant domestication on  
941 rhizosphere microbiome assembly and functions. *Plant Mol. Biol.* **90**, 635–644 (2016).
- 942 40. Wagner, M. R. et al. Microbe-dependent heterosis in maize. *Proc. Natl Acad. Sci. USA* **118**,  
943 e2021965118 (2021).

944 **Supplementary references**

- 945 41. Baldauf, J. A. et al. Single-parent expression is a general mechanism driving extensive  
946 complementation of non-syntenic genes in maize hybrids. *Curr. Biol.* **28**, 431–437 (2018).  
947 42. Rueda-Ayala, V., Ahrends, H. E., Siebert, S., Gaiser, T., Hüging, H. & Ewert, F. Impact of  
948 nutrient supply on the expression of genetic improvements of cereals and row crops—A  
949 case study using data from a long-term fertilization experiment in Germany. *Eur. J. Agron.*  
950 **96**, 34–46 (2018).  
951 43. Lasky, J. R. et al. Genome-environment associations in sorghum landraces predict  
952 adaptive traits. *Sci. Adv.* **1**, e1400218 (2015).  
953 44. Zomer, R. J., Trabucco, A., Bossio, D. A. & Verchot, L. V. Climate change mitigation: A  
954 spatial analysis of global land suitability for clean development mechanism afforestation  
955 and reforestation. *Agric. Ecosyst. Environ.* **126**, 67–80 (2008).  
956 45. Kalnay, E. et al. The NCEP/NCAR 40-year reanalysis project. *Bull. Am. Meteorol. Soc.* **77**,  
957 437–472 (1996).  
958 46. New, M., Lister, D., Hulme, M. & Makin, I. A high-resolution data set of surface climate over  
959 global land areas. *Clim. Res.* **21**, 1–25 (2002).  
960 47. Hengl, T. et al. SoilGrids250m: Global gridded soil information based on machine learning.  
961 *PLoS One* **12**, e0169748 (2017).  
962 48. Shangquan, W., Dai, Y., Duan, Q., Liu, B. & Yuan, H. A global soil data set for earth system  
963 modeling. *J. Adv. Model. Earth Syst.* **6**, 249–263 (2014).  
964 49. Caporaso, J. G. et al. Global patterns of 16S rRNA diversity at a depth of millions of  
965 sequences per sample. *Proc. Natl Acad. Sci. USA* **108**, 4516–4522 (2011).  
966 50. Magoč, T. & Salzberg, S. L. FLASH: fast length adjustment of short reads to improve  
967 genome assemblies. *Bioinformatics* **27**, 2957–2963 (2011).  
968 51. Bolyen, E. et al. Reproducible, interactive, scalable and extensible microbiome data  
969 science using QIIME 2. *Nat. Biotechnol.* **37**, 852–857 (2019).  
970 52. Callahan, B. J. et al. DADA2: High-resolution sample inference from Illumina amplicon data.  
971 *Nat. Methods* **13**, 581–583 (2016).  
972 53. Bokulich, N. A. et al. Optimizing taxonomic classification of marker-gene amplicon  
973 sequences with QIIME 2's q2-feature-classifier plugin. *Microbiome* **6**, 1–17 (2018).  
974 54. Yilmaz, P. et al. The SILVA and “all-species living tree project (LTP)” taxonomic  
975 frameworks. *Nucleic Acids Res.* **42**, D643–D648 (2014).  
976 55. Katoh, K., Misawa, K., Kuma, K. I. & Miyata, T. MAFFT: a novel method for rapid multiple  
977 sequence alignment based on fast Fourier transform. *Nucleic Acids Res.* **30**, 3059–3066  
978 (2002).  
979 56. Price, M. N., Dehal, P. S. & Arkin, A. P. FastTree 2—approximately maximum-likelihood  
980 trees for large alignments. *PLoS One* **5**, p.e9490 (2010).  
981 57. Abarenkov, Kessy; Zirk, Allan; Piirmann, Timo; Pöhönen, Raivo; Ivanov, Filipp; Nilsson, R.  
982 Henrik; Kõljalg, Urmas (2021): UNITE QIIME release for Fungi. Version 10.05.2021. UNITE  
983 Community.  
984 58. R Core Team (2021). R: A language and environment for statistical computing. R  
985 Foundation for Statistical Computing, Vienna, Austria. URL <https://www.R-project.org/>.  
986 59. Love, M. I., Huber, W. & Anders, S. Moderated estimation of fold change and dispersion  
987 for RNA-seq data with DESeq2. *Genome Biol.* **15**, 550 (2014).  
988 60. Oksanen, J. et al. (2020). vegan: Community Ecology Package. R package version 2.5-7.  
989 <https://CRAN.R-project.org/package=vegan>  
990 61. Kurtz, Z. D., Müller, C. L., Miraldi, E. R., Littman, D. R., Blaser, M. J. & Bonneau, R. A.  
991 Sparse and compositionally robust inference of microbial ecological networks. *PLoS*  
992 *Comput. Biol.* **11**, p.e1004226 (2015).  
993 62. Meinshausen, N. & Bühlmann, P. High dimensional graphs and variable selection with the  
994 Lasso. *Ann. Stat.* **34**, 1436–1462 (2006).  
995 63. Guo, Z. et al. Development of multiple SNP marker panels affordable to breeders through  
996 genotyping by target sequencing (GBTS) in maize. *Mol. Breed.* **39**, 1–12 (2019).  
997 64. Rogers, J. S. (1972). Measures of similarity and genetic distance. In *Studies in Genetics*  
998 VII. pp. 145–153. University of Texas Publication 7213. Austin, Texas  
999 65. Yang, J., Lee, S. H., Goddard, M. E. & Visscher, P. M. GCTA: a tool for genome-wide  
1000 complex trait analysis. *Am. J. Hum. Genet.* **88**, 76–82 (2011).  
1001 66. Kumar, S., Stecher, G., Li, M., Knyaz, C. & Tamura, K. MEGA X: molecular evolutionary  
1002 genetics analysis across computing platforms. *Mol. Biol. Evol.* **35**, 1547 (2018).

- 1003 67. Bernal-Vasquez, A. M., Utz, H. F. & Piepho, H. P. Outlier detection methods for generalized  
1004 lattices: a case study on the transition from ANOVA to REML. *Theor. Appl. Genet.* **129**,  
1005 787–804 (2016).
- 1006 68. Butler, D. G., Cullis, B. R., Gilmour A. R., Gogel, B. G. & Thompson, R. ASReml-R  
1007 Reference Manual Version 4. (2017) VSN International Ltd, Hemel Hempstead, HP1 1ES,  
1008 UK.
- 1009 69. Browning, B. L., Zhou, Y. & Browning, S. R. A one-penny imputed genome from next  
1010 generation reference panels. *Am. J. Hum. Genet.* **103**, 338–348 (2018).
- 1011 70. Yu, J. et al. A unified mixed-model method for association mapping that accounts for  
1012 multiple levels of relatedness. *Nat. Genet.* **38**, 203–208 (2006).
- 1013 71. VanRaden, P. M. Efficient methods to compute genomic predictions. *J. Dairy Sci.* **91**, 4414–  
1014 4423 (2008).
- 1015 72. Zhang, Z. et al. Mixed linear model approach adapted for genome-wide association studies.  
1016 *Nat. Genet.* **42**, 355–360 (2010).
- 1017 73. Pérez, P. & de Los Campos, G. Genome-wide regression and prediction with the BGLR  
1018 statistical package. *Genetics* **198**, 483–495 (2014).
- 1019 74. Holm, S. A simple sequentially rejective multiple test procedure. *Scand. J. Stat.* **6**, 65–70  
1020 (1979).
- 1021 75. Benjamini, Y. & Hochberg, Y. Controlling the false discovery rate: a practical and powerful  
1022 approach to multiple testing. *J. Royal Stat. Soc. Ser. B.* **57**, 289–300 (1995).
- 1023 76. Chen, H. et al. Control for population structure and relatedness for binary traits in genetic  
1024 association studies via logistic mixed models. *Am. J. Hum. Genet.* **98**, 653–666 (2016).
- 1025 77. Breslow, N. E. & Clayton, D. G. Approximate inference in generalized linear mixed models.  
1026 *J. Am. Stat. Assoc.* **88**, 9–25 (1993).
- 1027 78. Efron, B. Bootstrap methods: another look at the jackknife. *Ann. Stat.* **7**, 1–26 (1979).
- 1028 79. Schmitz Carley, C. A. et al. Automated tetraploid genotype calling by hierarchical clustering.  
1029 *Theor. Appl. Genet.* **130**, 717–726 (2017).
- 1030 80. de Cáceres, M., Jansen, F. & Dell, N. Indicspecies: Relationship between species and  
1031 groups of sites, R package (2020).
- 1032 81. Kursa, M. B. & Rudnicki, W. R. Feature selection with the Boruta package. *J. Stat. Softw.*  
1033 **36**, 1–13 (2010).
- 1034 82. Liaw, A. & Wiener, M. Classification and regression by randomForest. *R news* **2**, 18–22  
1035 (2002).
- 1036 83. Gates, D. J. et al. Single-gene resolution of locally adaptive genetic variation in Mexican  
1037 maize. *Preprint at bioRxiv* <https://doi.org/10.1101/706739> (2019).
- 1038 84. François, O., Martins, H., Caye, K. & Schoville, S. D. Controlling false discoveries in  
1039 genome scans for selection. *Mol. Ecol.* **25**, 454–469 (2016).
- 1040 85. Marcon, C. et al. BonnMu: a sequence-indexed resource of transposon-induced maize  
1041 mutations for functional genomics studies. *Plant Physiol.* **184**, 620–631 (2020).
- 1042 86. Bates, D., Mächler, M., Bolker, B., & Walker, S. Fitting linear mixed-effects models using  
1043 lme4. *J. Stat. Softw.* **67**, 1–48 (2015).
